# Supplementary material for: Molecular signature of different lesion types in the brain white matter of patients with progressive multiple sclerosis
Source: Springer Nature journal article supplement (doi:10.1186/s40478-019-0855-7), 2019-12-01

# Supplementary Fig. 1

*RNAscope: Negative (red and green targeting two bacterial genes) and positive (PPIB/POLR2A) controls*

Negative controls

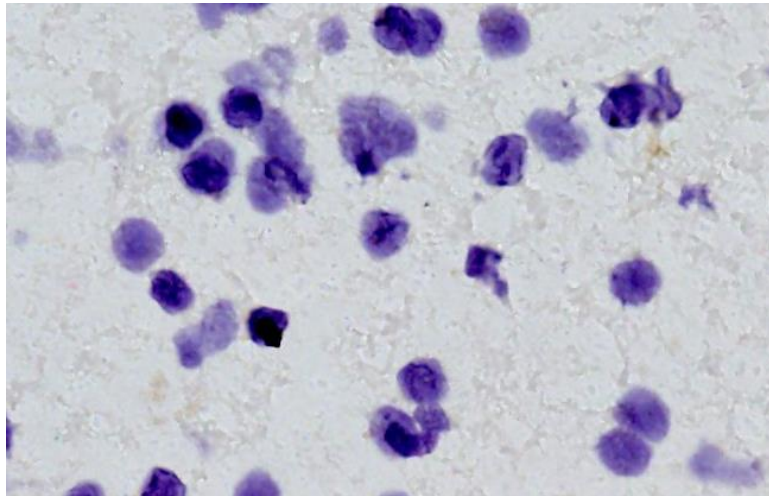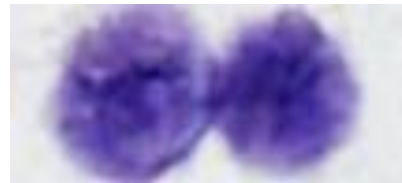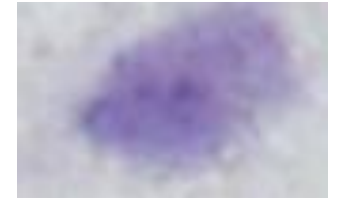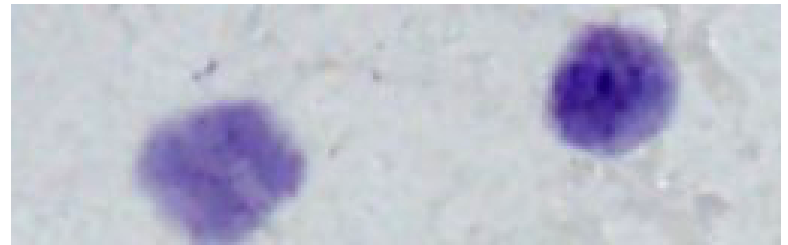

Positive controls

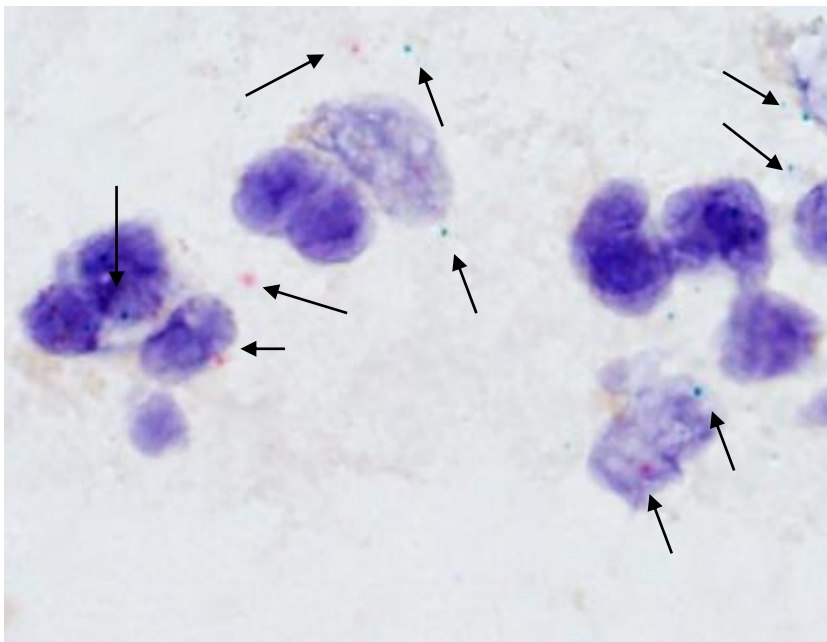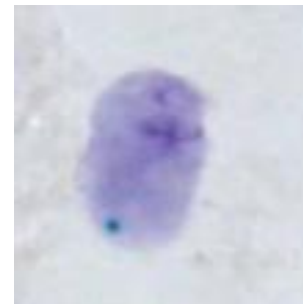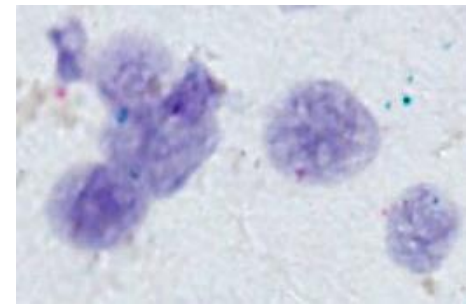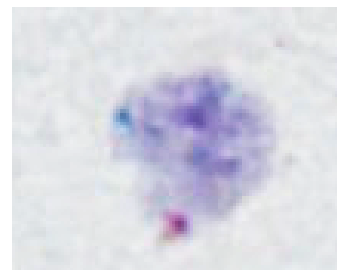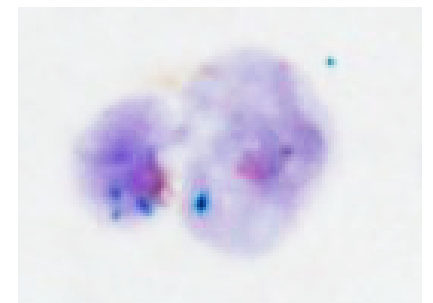

Supplement: MOESM3 [file 25667028]
