# Supplementary material for: Molecular signature of different lesion types in the brain white matter of patients with progressive multiple sclerosis
Source: Springer Nature journal article supplement (doi:10.1186/s40478-019-0855-7), 2019-12-01
Supplement: MOESM6 [file 25667028]

## Lesion specific genes

| Active Lesion FDR        | Remyelinating Lesion FDR  | Inactive Lesion FDR       | Chronic Active Lesion FDR |
|--------------------------|---------------------------|---------------------------|---------------------------|
| AEN 0,0346681            | BSN-AS2 0,002393824       | RPS11 0,00658668          | SLMAP 0,0311316           |
| USP6NL 0,02117226        | AC007036.6 0,011573019    | DECR1 0,03133316          | RALYL 0,001235            |
| RAB33B 0,04786741        | NOSTRIN 0,00993533        | DDB1 0,02942181           | PTPRR 0,0016301           |
| CD53 0,03710795          | SETP11 0,003138605        | HIC2 0,01020412           | MYO9B 0,0020758           |
| PRPF3 0,04606266         | RP11-373D23.2 0,011612889 | RP11-77P6.2 0,02854829    | XAB2 0,0153524            |
| CAMSAP1 0,04160161       | HMGB1P29 0,014870868      | STK16 0,03689556          | CENPQ 0,0347818           |
| KCNK10 0,02884393        | MARCOL 0,000916951        | RP11-14I17.2 0,00308768   | ATP5G2 0,0083566          |
| RP11-513G19.1 0,01685352 | CST7 2,17924E-07          | MAX 0,02161023            | CDK14 0,0074475           |
| GPATCH8 0,04094743       | CTD-2270F17.1 7,76298E-05 | SPIN2B 0,03737081         | RP11-981G7.1 0,0331641    |
| HLA-DOA 0,00194793       | ROR2 0,000410458          | SCYL3 0,00204561          | GRM2 0,0237033            |
| MAGI1 0,00393283         | GDF10 0,037876315         | SUGCT 0,00804002          | LONP1 0,016126            |
| GALNT10 0,0481232        | AC011243.1 0,037051022    | GDPD5 0,03223516          | SYN3 0,0235784            |
| AXL 0,01270943           | PWP2 0,02835798           | DCAF4L1 0,03026691        | TAOK3 0,030809            |
| ATPIF1 0,00983227        | RP6-127F18.2 0,020347279  | CTDSP2 0,01126974         | CMPK2 0,0069204           |
| LRP1 0,01446273          | LRRTM3 0,02685009         | PABPC5 0,01259977         | FAAHP1 0,0015727          |
| NLK 0,00690775           | SECTM1 0,012597837        | HDAC7 0,01064747          | CPNE4 0,030226            |
| RP11-319G9.5 0,03937317  | KIAA0368 0,034901106      | XXbac-B562F10.11 0,001523 | GTPBP1 0,0496899          |
| SINHCAF 0,03073622       | MEGF11 0,014593327        | AC012494.1 0,02003063     | CA11 0,0062989            |
| P2RX1 0,00105767         | RNF43 0,000175003         | PLXNA1 0,00068598         | ARHGEF9 0,0020758         |
| ITGAX 0,00552976         | PLAC8L1 0,009546169       | PTP4A2 0,04899186         | STK17A 0,0011331          |
| GNG7 0,02284831          | CTD-2017C7.3 0,04164315   | RP11-77K12.3 0,01483404   | SIAH3 0,0056268           |
| ENO3 0,01510929          | KIF5C 0,021486247         | CXorf56 0,00111109        | RMND5B 0,0209709          |
| NOL7 0,00797694          | RP11-513M1.1 0,038911595  | TFR2 0,01586979           | ZNF257 0,0021179          |
| CTD-2127H9.1 0,02199505  | RP11-831A10.1 0,005242946 | LOC102724788 0,00312112   | FOXM1 0,0364194           |
| SLC41A1 0,01191022       | SEPT7 0,044533341         | DDHD2 0,00266026          | MAOA 0,0031975            |
| CTD-2525I3.6 0,03762911  | ATL1 0,002044189          | BTF3 0,02498499           | RP11-210K20.2 0,0357824   |
| MBNL1-AS1 0,02697454     | INTS7 0,011737144         | COX7A2 0,04117511         | F8A1 0,0015379            |
| CTD-2353F22.1 0,02275118 | ZNF385C 0,013543285       | RP9 0,02373654            | PLEKHG4 0,0014849         |
| AC004980.7 0,03058081    | BATF2 0,005543618         | UQCRHL 0,04847113         | TPM3 0,0043775            |
| LBH 0,00872089           | HTR4 0,038961314          | WASHC3 0,03475893         | GCC2 0,0286573            |
| MAP7D1 0,0492243         | LPAR3 5,55031E-06         | SCN11A 3,0461E-05         | PMF1 0,0281394            |
| ZNF682 0,045832          | LINC01979 0,034953843     | OSGEP 0,00678383          | GAPDHP61 0,0127382        |
| CYR61 0,04681291         | LINC00595 0,014351712     | NOP53-AS1 0,02637192      | CD82 0,0131126            |
| ARL5A 0,04831101         | RP11-182I10.1 0,005393632 | ATP7B 0,00066133          | PIRT 0,022492             |

### Lesion specific genes

|               |            |                 |             |              |            |               |           |
|---------------|------------|-----------------|-------------|--------------|------------|---------------|-----------|
| GGT5          | 0,00268093 | GRK6P1          | 0,02769632  | GRIK1-AS1    | 0,00045802 | CPEB3         | 0,0357816 |
| APOC1         | 0,01603545 | ZSWIM9          | 0,044811327 | EXOC1        | 0,01588841 | CAMTA1        | 0,0492649 |
| ZNF251        | 0,0444629  | USP2-AS1        | 0,001945646 | ETFA         | 8,0542E-08 | HPCA          | 0,0001664 |
| HCP5          | 0,04570502 | PPP2R2A         | 0,033223689 | RP11-230C9.2 | 0,00531048 | MLF1          | 0,0161797 |
| NFATC4        | 0,02740399 | LINC02448       | 0,000415557 | ADAMTS9-AS1  | 0,02271492 | CHFR          | 0,037523  |
| ARL11         | 0,02138815 | VIP             | 0,000890772 | CADPS2       | 0,01120746 | AC006042.8    | 0,0053052 |
| LOC374443     | 2,4878E-05 | CDC45           | 2,89077E-07 | TCP1         | 0,0227969  | FAXC          | 0,0279601 |
| ARHGAP45      | 0,04347857 | RP11-326C3.11   | 8,84795E-05 | EHD2         | 0,02162186 | FUS           | 0,0418903 |
| GSAP          | 0,01123341 | FCRL5           | 2,27166E-29 | PRPS1P2      | 0,04296046 | EMC8          | 0,0013229 |
| LSG1          | 0,02400352 | COL4A6          | 0,003165525 | ERMARD       | 0,00884815 | RGS4          | 0,0100517 |
| MAP4K1        | 0,04357252 | LOC102724604    | 4,24509E-06 | FPGT-TNNI3K  | 0,02619584 | POLG          | 0,0181758 |
| RP11-767L7.1  | 0,00849557 | RNF139          | 0,0415735   | NPIPP1       | 0,02912369 | ADAM23        | 0,0043409 |
| SPDYE3        | 0,03245916 | HNRNPA1P59      | 0,009587352 | SPDYE1       | 0,00012584 | RP11-737O24.3 | 0,0111227 |
| ARSB          | 0,00027913 | SH3RF1          | 0,036642558 | TDRD9        | 0,00477592 | TMEM104       | 0,0176987 |
| SEPT9         | 0,04873014 | MROH6           | 0,015445787 | RP1-30M3.5   | 0,03857495 | PTPN5         | 0,0003315 |
| MIGA1         | 0,02619124 | GNG12-AS1       | 0,00079506  | SHANK3       | 0,00804002 | LAGE3         | 0,0327996 |
| RP11-712P20.2 | 0,04312006 | AREL1           | 0,026486518 | TUFM         | 0,01161105 | CHST6         | 5,254E-05 |
| ATP5PDP4      | 0,02070863 | IL9             | 0,000602185 | ZNF839       | 0,01964948 | OR9P1P        | 5,385E-05 |
| ITGAM         | 0,04745476 | COL11A1         | 0,021793986 | CCNA2        | 7,2E-05    | SLITRK4       | 0,0017755 |
| ADGRD1        | 0,00952622 | MYLK3           | 1,85497E-18 | AUH          | 0,01020412 | CACNB1        | 0,0436882 |
| MOV10         | 0,04398626 | NCOA7           | 0,019000762 | PCYT1B       | 0,00553222 | EML3          | 0,0153236 |
| RP11-589N15.2 | 0,00657222 | DENND6B         | 0,039636959 | PIGT         | 0,03712668 | KDM4B         | 0,0305817 |
| LRRC55        | 0,00268543 | FRMPD2B         | 0,000648158 | CRLF3        | 0,0104876  | PEX16         | 0,0019655 |
| Z83001.1      | 0,00953076 | ST6GALNAC1      | 0,035032008 | PSMA5        | 0,01632687 | CHRM1         | 0,0471971 |
| NAV2-AS5      | 0,0182194  | SNORA14B        | 0,001384317 | FKTN         | 0,02729275 | FUT4          | 0,0402173 |
| CCL28         | 0,03820757 | IL2RG           | 3,8819E-08  | BANF1        | 0,00839409 | CDH8          | 0,0031031 |
| FAM241A       | 0,00471583 | ZAP70           | 7,39406E-05 | ZNF287       | 0,00631041 | COMMD5        | 0,0391089 |
| RLIMP1        | 0,0171205  | LA16c-313D11.12 | 1,8181E-05  | ZNF571-AS1   | 0,02217867 | GSTP1         | 0,0157221 |
| KRT8P12       | 0,01262704 | LINC02226       | 0,005378749 | MAGEF1       | 0,00339101 | ANKLE2        | 0,0357413 |
| RNF212        | 0,0216833  | RP5-912I13.1    | 0,004370268 | MCF2L        | 0,02394086 | NAMA          | 0,0035475 |
| VEGFD         | 0,00169602 | ACACA           | 0,012764991 | USP17L7      | 0,0201185  | NADSYN1       | 0,0008055 |
| ENPP7P10      | 0,00528658 | GALNT13         | 0,044320302 | PPP1R15A     | 0,04884435 | FAM221B       | 0,0456617 |
| RP11-116O18.3 | 0,03921184 | RPS4XP16        | 0,034258257 | NEIL2        | 0,04301961 | RPS21         | 0,0037851 |
| RP4-724E16.2  | 0,01043241 | CTSW            | 0,020906893 | FSD2         | 0,01582475 | LMO4          | 0,0280404 |
| GSDMD         | 0,01083933 | ZIM2            | 0,018567887 | LRRC32       | 0,00312545 | RP1-111C20.4  | 0,0015599 |

### Lesion specific genes

|              |            |               |             |               |            |                |           |
|--------------|------------|---------------|-------------|---------------|------------|----------------|-----------|
| POPDC3       | 0,01863947 | SYNE4         | 0,00578022  | COMMD1        | 0,00483907 | CHL1-AS1       | 0,0004283 |
| IL7          | 0,04561897 | OTX1          | 0,034155537 | KRTCAP3       | 0,02255765 | PPP1R14BP3     | 0,0156901 |
| NBPF15       | 0,00943273 | EMID1         | 0,024737024 | LOC102724532  | 0,04436812 | H3F3AP2        | 0,0179234 |
| CYCS         | 0,01979853 | TDH           | 0,006107709 | GMDS-AS1      | 0,01910089 | DCX            | 0,0387499 |
| NWD1         | 0,00247489 | PLD5          | 0,020376439 | C19orf18      | 0,0002533  | PPARGC1A       | 5,288E-06 |
| RASGRF1      | 0,01139396 | LINC01376     | 0,021014611 | CYB5B         | 0,00452526 | POLRMT         | 0,0319751 |
| SLC6A15      | 0,03177472 | FUT8-AS1      | 0,036162972 | LOC105377348  | 0,0089456  | RP11-1023L17.1 | 0,0027712 |
| FRRS1        | 0,02190818 | SLC6A20       | 6,26511E-06 | RASGEF1B      | 0,04145577 | CASC4          | 0,0171996 |
| PCK2         | 0,04164672 | FXYP4         | 0,033430758 | NCAM2         | 0,02606287 | CENPJ          | 0,018787  |
| GMFG         | 0,00299278 | HMGA1P7       | 0,009174788 | FANCM         | 0,00555589 | JUND           | 0,0390017 |
| HTR1DP1      | 0,02411265 | PLCE1-AS1     | 0,029333143 | GLT8D1        | 0,00946479 | AC007566.10    | 0,0042491 |
| NDNF         | 0,03378279 | DYNLRB2       | 5,37544E-06 | RP11-631N16.2 | 0,00346512 | CAMK2B         | 0,0494869 |
| DHFR         | 0,02473348 | PABPC4L       | 1,29E-06    | SEPT2         | 0,02442679 | TMEM241        | 0,0236933 |
| GPR132       | 0,0486947  | ATG9B         | 0,032055481 | ZBTB21        | 0,01227891 | NDUFB8         | 0,0325527 |
| GNAO1        | 0,00320255 | SNORA11       | 1,44451E-07 | QRICH2        | 0,00476415 | PSD2           | 0,008006  |
| HARS         | 0,01812942 | AP001172.3    | 0,001801954 | SHISA4        | 0,04129461 | PREX2          | 0,0152282 |
| ATG7         | 0,02127658 | CYP51A1P2     | 0,003012564 | TMEM50B       | 0,01526665 | ASTN2          | 0,0011315 |
| POP7         | 0,03659297 | EPPK1         | 2,94704E-07 | NUDC          | 0,04743291 | SCRN1          | 0,0460125 |
| RP11-250B2.6 | 0,01270633 | MYO3A         | 0,00215261  | TCAP          | 0,00197848 | DDI2           | 0,000226  |
| DENND2A      | 0,0131519  | GRID1-AS1     | 0,038025331 | RBBP7         | 0,01444002 | PFN1P2         | 0,0152243 |
| ZC3H12C      | 0,01809431 | COX18         | 0,045483208 | TXNRD1        | 0,00028273 | TANC2          | 0,0270624 |
| GPR18        | 0,02977911 | LINC02028     | 0,009946806 | ARF5          | 0,04668077 | TMEM189        | 0,005183  |
| GYG2         | 0,00122119 | PHYHIPL       | 0,040976897 | CCT3          | 0,02770102 | NTN4           | 0,0053363 |
| LIX1L        | 0,02185276 | AC091167.3    | 0,016238578 | SLC3A2        | 0,00639918 | PIGG           | 0,0012494 |
| CYTH4        | 0,0244976  | ANKRD20A21P   | 0,003165525 | NTSR2         | 0,01636197 | AC068282.3     | 0,0001158 |
| FCGRT        | 0,00943273 | RP11-795J1.1  | 0,02710283  | KLHL31        | 0,02610102 | PRRT1          | 0,026501  |
| YWHAG        | 0,00909923 | PROB1         | 0,009914012 | TRIM52-AS1    | 0,02085285 | KALRN          | 0,023432  |
| NCBP2AS2     | 0,0377567  | ARHGAP31-AS1  | 0,011903556 | RP11-203B9.4  | 0,0243418  | THOC7          | 0,0172178 |
| FLJ16779     | 0,01796297 | PEG10         | 0,006654577 | HEY1          | 0,01922606 | NEGR1          | 0,0450067 |
| FSCN1        | 0,00816423 | SIGLEC7       | 0,015445787 | POLE          | 0,02218767 | FAM49A         | 0,0038005 |
| CLEC7A       | 0,0330756  | SNED1         | 0,012795031 | TRMT10A       | 0,01343304 | GRPEL2         | 0,04051   |
| ZNF423       | 0,02298038 | RAET1E        | 0,026174021 | ZNF559-ZNF177 | 0,04327469 | CACNG2         | 0,0089464 |
| C1orf54      | 0,03817747 | ACOX2         | 0,005170033 | TMEM64        | 0,04076783 | NCK2           | 0,001017  |
| IL4R         | 0,0396499  | RP11-1055B8.2 | 0,020498522 | ADAM8         | 0,00025522 | CLDN10         | 0,0060667 |
| BEX3         | 0,01591602 | ANP32B        | 0,036770606 | DTD2          | 0,02899671 | HPCAL4         | 0,0045221 |

### Lesion specific genes

|               |            |               |             |             |            |              |           |
|---------------|------------|---------------|-------------|-------------|------------|--------------|-----------|
| ELK3          | 0,0356742  | PAPOLB        | 0,019553242 | SLC2A2      | 0,03432468 | CACNA2D3-AS1 | 0,0031872 |
| LDOC1         | 0,0167868  | GNL2          | 0,047107324 | LMCD1       | 0,02519651 | FBXO3        | 0,0170538 |
| RNASEH1       | 0,00590524 | RP11-22L13.1  | 0,001321807 | WARS2       | 0,02095915 | NOL4L        | 0,0160816 |
| WLS           | 0,01233937 | MUM1L1        | 0,025093584 | MBOAT7      | 0,00201546 | DICER1-AS1   | 0,0053363 |
| CDYL          | 0,03958853 | AK3P5         | 0,024214974 | CTSO        | 4,6276E-08 | AC000120.7   | 0,0348471 |
| KLF11         | 0,01844309 | PAIP1         | 0,023592936 | KIF22       | 0,02041158 | ARHGAP26     | 3,652E-05 |
| TMEM86A       | 0,00373769 | NDUFS1        | 0,021425652 | WDR11-AS1   | 0,02068917 | PRCD         | 0,0051547 |
| RP11-666F17.1 | 0,00066389 | SEC1P         | 0,005202621 | PLA2G12A    | 0,00760683 | GEMIN6       | 0,0066543 |
| ZNF407        | 0,04617666 | HIST1H4E      | 0,047877517 | ELOB        | 0,04694821 | JAGN1        | 0,0112269 |
| MTTP          | 0,02186921 | GOT1          | 0,029433559 | TIMP4       | 0,02836884 | BSDC1        | 0,0095812 |
| PIM1          | 0,02984519 | BBC3          | 0,023777454 | LONRF1      | 0,03863182 | ARSK         | 0,0092318 |
| NPAP1         | 0,0079003  | RP11-531F16.3 | 0,04102881  | KCNMB4      | 0,04366488 | LINC00641    | 0,0172178 |
| TMEM246       | 0,04179094 | C10orf67      | 3,57719E-05 | FUT2        | 0,0255969  | MAP6         | 0,003189  |
| LOC101928909  | 0,03820757 | KL            | 0,032055481 | AATBC       | 0,02650466 | OR2L13       | 0,0108975 |
| RTL5          | 0,03218301 | DNAH12        | 0,000215919 | METTL17     | 0,00339336 | PPP6R2       | 0,0081643 |
| DDX60         | 0,00858486 | RP11-486O12.2 | 0,049855107 | IRF9        | 0,01519612 | RNF175       | 0,0012626 |
| LINC02018     | 0,02479388 | ANKRD18CP     | 0,017918842 | KB-1460A1.5 | 0,00058583 | PCNX2        | 0,0390894 |
| TBXAS1        | 0,00661697 | CLEC3B        | 2,79582E-05 | FKBP11      | 0,04436812 | ARSA         | 0,0479658 |
| SALL2         | 0,04791591 | IGFBP7-AS1    | 4,70511E-05 | SESTD1      | 0,02679653 | AMER3        | 0,0212026 |
| CYP2E1        | 0,00039589 | NGDN          | 0,027733876 | AP2A2       | 0,00238667 | RP4-555D20.2 | 0,0350768 |
| WDFY4         | 0,03447927 | SPANXA2-OT1   | 0,006053099 | HSD3BP5     | 0,00151736 | LSMEM2       | 0,0022136 |
| TBP           | 0,01649133 | AC078883.3    | 0,016202926 | EXOSC3P1    | 0,03832645 | MBD2         | 0,0061359 |
| GVQW1         | 0,0444739  | TRGC1         | 1,11204E-06 | EHHADH      | 0,00843056 | CCDC28A      | 0,0074845 |
| CMTM6         | 0,00846691 | OR6W1P        | 0,044366253 | LAPTM4B     | 4,6269E-05 | PIAS1        | 6,227E-05 |
| MRPL44        | 0,03950353 | KCNG4         | 0,011041728 | NR1D1       | 0,03413577 | TSEN54       | 0,0225222 |
| LONRF3        | 0,03995105 | RP11-1391J7.1 | 0,001393534 | MLYCD       | 0,04033813 | RERGL        | 0,0060497 |
| LINC00654     | 0,01191022 | P2RY8         | 4,74323E-14 | LOC653160   | 0,04610798 | DPP6         | 5,465E-05 |
| HADH          | 0,00600272 | RP11-557H15.5 | 0,000498567 | RIDA        | 0,00020442 | CR1          | 0,0140533 |
| ZNF367        | 0,0313914  | TNFRSF10C     | 0,00616312  | ZNF85       | 0,04726936 | HMBS         | 0,0082678 |
| CMBL          | 0,00249147 | LINC01763     | 0,00280003  | AC093495.4  | 0,04311227 | PWAR1        | 0,0002074 |
| RP11-2J18.1   | 0,04292855 | TSPAN2        | 0,00734021  | MUSK        | 0,00874333 | PLPPR5       | 0,0236933 |
| LPAR6         | 0,01844309 | CALM2         | 0,016599737 | SH3RF3      | 0,02435096 | RP11-549L6.2 | 0,0010016 |
| FAM122C       | 0,04716392 | CTD-2373H9.5  | 0,044838942 | STRADB      | 0,01400724 | AL139147.1   | 0,015491  |
| BTBD19        | 0,00886971 | SNORA37       | 0,00361401  | TIGD6       | 0,02421427 | GRIN3A       | 0,0025392 |
| CD300LF       | 0,01993007 | FAM181A-AS1   | 1,27E-05    | MRV11       | 0,01307299 | CHTOP        | 6,442E-05 |

### Lesion specific genes

|              |            |               |             |                |            |              |           |
|--------------|------------|---------------|-------------|----------------|------------|--------------|-----------|
| PDLIM3       | 0,00254887 | RP11-367B6.2  | 0,014869517 | ZNF581         | 0,02002752 | SMOC2        | 0,0150988 |
| UNC93B1      | 0,02564369 | RP3-395M20.3  | 0,024252774 | DDX27          | 0,01363747 | ARHGDI1B     | 0,0239777 |
| ARPIN        | 0,00138615 | INSM1         | 0,021271051 | FAM192A        | 0,03517264 | PTPN23       | 0,0287103 |
| ADAMTS10     | 0,02392518 | OR4F4         | 0,000827793 | RP11-508N22.12 | 0,04855826 | CACNA1C      | 0,042067  |
| NBPF9        | 0,04119051 | GYS2          | 0,002044189 | LINC00969      | 0,02330564 | ZNF676       | 0,0008819 |
| ZNF30        | 0,03043727 | PLAT          | 0,024470396 | AZIN1-AS1      | 0,01199599 | UCKL1        | 0,0209452 |
| LAMA4        | 0,01521638 | CASC15        | 0,033430758 | TMC2           | 0,00168444 | COX16        | 0,0251978 |
| SEC14L1P1    | 0,03221405 | SPRY4-AS1     | 0,020520473 | ZNF8           | 0,03330491 | OCEL1        | 0,0212826 |
| ZBTB49       | 0,00902931 | RNU6ATAC      | 0,002808068 | PSMB6          | 0,01048502 | CFAP36       | 0,0272948 |
| STX4         | 0,01588828 | RPL34         | 0,034443806 | LRRC75A        | 0,00297929 | IMPG2        | 0,0006009 |
| VDAC2        | 0,02878593 | HSPA12B       | 0,036716704 | NOVA2          | 0,00652942 | CBWD1        | 0,0026888 |
| ZNF622       | 0,03209564 | RP11-815J21.1 | 0,037762066 | SPRTN          | 0,0072792  | CKMT1B       | 0,0039257 |
| LINC01004    | 0,0333973  | NDUFA1        | 0,031201564 | RAD17P2        | 0,0003748  | PCDHB14      | 0,0135346 |
| NCF4         | 0,04405117 | RP11-276E15.4 | 0,013326927 | ARL4C          | 0,00032504 | CD276        | 0,006001  |
| SIRPB2       | 0,01601434 | RNU4-1        | 0,045483208 | LPXN           | 0,01297801 | SRP14        | 0,005661  |
| B3GNT7       | 0,04334776 | IGHG3         | 7,16083E-23 | CCDC13-AS1     | 0,04006884 | TCEAL2       | 0,0014598 |
| FAM110C      | 0,04698675 | USP27X-AS1    | 7,9558E-05  | CRHR2          | 0,04763288 | FAM153B      | 0,0110565 |
| GBGT1        | 0,0025873  | MAPRE2        | 0,000170352 | PRKAA1         | 0,00315583 | MKLN1-AS     | 0,0052332 |
| EDRF1-DT     | 0,01330282 | TCTE1         | 1,42353E-05 | FADS2          | 0,02701803 | KCNS2        | 0,0327231 |
| FERMT3       | 0,00450356 | CCL5          | 1,6358E-17  | CYP4F3         | 0,04956138 | CLIC4        | 0,0066675 |
| JPX          | 0,02765999 | SPAG8         | 0,00839336  | TMEM230        | 0,00042694 | RP11-36N20.1 | 0,0058085 |
| SLA          | 0,0203042  | AKR1C1        | 0,003702653 | EGR1           | 0,00792433 | EPC2         | 0,0285376 |
| SLC29A3      | 0,04314326 | RP13-270P17.2 | 0,000176314 | ISPD           | 0,00723508 | FMO3         | 0,014774  |
| MYC          | 0,024056   | RHPN2         | 0,024640527 | RP1-179N16.6   | 0,00322754 | MDM2         | 0,0394409 |
| HLA-DQA1     | 0,00935734 | RP4-669H2.1   | 0,000143688 | NFYC-AS1       | 0,0072837  | LOC100507156 | 0,0113019 |
| UCP2         | 0,03108859 | SP8           | 0,006999782 | CNTF           | 0,0272234  | SNHG15       | 0,0002951 |
| SLC25A30     | 0,00202868 | CYCSP23       | 0,014077263 | RP11-196G11.4  | 0,0230488  | NETO1        | 0,0090794 |
| ASPEN        | 0,00422792 | PAGR1         | 0,039255687 | STC1           | 0,00099504 | ABCA6        | 0,0082988 |
| SLC39A4      | 0,00909514 | RP11-230B22.1 | 0,00158401  | CPSF3          | 0,04282916 | NBEA         | 0,0067778 |
| ZNF114       | 0,00970687 | FAM167A-AS1   | 1,34316E-09 | RP5-921G16.1   | 0,03696877 | TESPA1       | 5,385E-06 |
| RP11-245J9.5 | 0,00435574 | MCM8          | 0,034108605 | CWF19L1        | 0,02808693 | OR2H2        | 0,000487  |
| SH3BP2       | 0,02686324 | C2orf40       | 0,007607751 | GPKOW          | 0,00470824 | DZIP1        | 0,0013131 |
| LPIN2        | 0,01614446 | SLC16A1       | 0,044433387 | LOC101927314   | 0,01313782 | SEC22C       | 0,0144781 |
| SCIMP        | 0,00360295 | RP11-725G5.3  | 0,00077635  | LNP1           | 0,01226375 | RNF146       | 0,0204619 |
| PTPN6        | 0,03511891 | RBP5          | 3,5216E-05  | EDNRB          | 0,00838181 | SNX32        | 0,0347536 |

### Lesion specific genes

|               |            |               |             |               |            |              |           |
|---------------|------------|---------------|-------------|---------------|------------|--------------|-----------|
| GRK4          | 0,02340911 | C17orf97      | 0,018854767 | ITM2C         | 0,00846602 | RP11-64B16.4 | 0,0293798 |
| HERC5         | 0,02849035 | NDUFB1        | 0,023189638 | ASRGL1        | 0,01309342 | TMEM196      | 0,0319516 |
| TRAF3IP3      | 0,02411265 | TAF5L         | 0,035966681 | ELP3          | 0,01154612 | CREB1        | 0,0410204 |
| RP11-211G3.2  | 0,03544715 | TOMM20        | 0,032585745 | UBE2B         | 1,2106E-05 | RYKP1        | 0,0349218 |
| NRSN2-AS1     | 0,00222497 | ALPK3         | 0,009881359 | S100A8        | 0,04382976 | MXRA7        | 0,000399  |
| CRB1          | 0,00039859 | RP11-121A14.2 | 0,000138642 | C1orf140      | 0,01026217 | ZHX2         | 0,0065674 |
| MBNL2         | 0,02624787 | SLC22A18      | 0,019756656 | PLEKHF2       | 0,04946033 | LRRC49       | 0,0340651 |
| RAB42         | 0,00625655 | LOC101928489  | 0,018990832 | LIX1          | 0,00088723 | NFE2L3       | 0,0465448 |
| RP11-274B21.9 | 0,01191022 | CBX1P2        | 0,034005027 | TNFRSF12A     | 0,03673183 | G6PD         | 0,039411  |
| OSMR          | 0,00872804 | YWHAE         | 0,011966219 | SERPIND1      | 0,00143844 | DPH7         | 8,195E-06 |
| SOD3          | 0,02945696 | PCDH9-AS3     | 0,048188278 | IFRD1         | 0,03509751 | LPCAT4       | 0,0081531 |
| NCF2          | 0,00909923 | LRRC17        | 0,044930381 | RP5-826L7.1   | 0,00843071 | TMEM52B      | 0,0342591 |
| KBTBD6        | 0,00224636 | TUB-AS1       | 0,001892743 | LINC01277     | 0,01269102 | CMTR1        | 0,0169221 |
| PRRG4         | 0,0444739  | ADORA2A       | 0,000877427 | MIR4697HG     | 0,01088945 | UBE2H        | 0,0392441 |
| DSC2          | 0,03488796 | LINC00649     | 1,41271E-10 | RP11-49K24.8  | 0,00082058 | SRGAP1       | 0,0137211 |
| TAPBP         | 0,01873205 | MROH7         | 0,013459481 | MGAM          | 0,00296708 | RP11-98J23.2 | 0,0038844 |
| NR2E1         | 0,00217246 | CAVIN1        | 0,032707038 | GLIS1         | 0,03310459 | C8orf31      | 0,0363513 |
| ABTB2         | 0,01237608 | CFAP99        | 1,15015E-11 | PTMA          | 0,00478709 | FUT11        | 0,0012154 |
| SDCBP2-AS1    | 0,03455922 | IRF6          | 2,28928E-07 | LINC02427     | 0,00090907 | FAM184A      | 0,0005952 |
| P2RY2         | 0,02101042 | RP1-130L23.1  | 0,002127989 | ETNPPL        | 0,00011545 | LINC01018    | 8,772E-05 |
| RP11-553K8.5  | 0,00510742 | LINC02344     | 1,47162E-06 | DNAJC14       | 0,01386583 | LRMP         | 0,0044915 |
| TMEM169       | 8,5578E-05 | CTF1          | 0,041880982 | MAPT-IT1      | 0,00064024 | ATP2B4       | 0,0471523 |
| ATP1B2        | 0,041098   | FAF1          | 0,027470324 | UBXN8         | 0,03671022 | KANSL3       | 0,0188442 |
| GNL1          | 0,00718729 | IGHM          | 1,26779E-24 | ZDHHC11       | 0,0174134  | NME5         | 0,0021305 |
| PSG1          | 0,00360399 | SS18L2P2      | 1,20127E-06 | RFWD3         | 0,04669596 | ADAR         | 0,0382906 |
| CAMK2N1       | 0,03060543 | STX11         | 0,04934261  | LOC101927164  | 0,0081633  | PSKH1        | 0,0156021 |
| B3GLCT        | 0,00336549 | TTLL11-IT1    | 0,009296258 | PTPN1         | 0,01895687 | TOX2         | 0,0100699 |
| CPEB1-AS1     | 0,01492257 | CTA-963H5.5   | 0,041341818 | LEAP2         | 0,03732864 | LIN9         | 0,000201  |
| PTPN7         | 0,02432995 | FAM166B       | 1,14399E-09 | SERPINE2      | 0,03326368 | CROCCP2      | 0,0224753 |
| MRPL43        | 0,02729831 | ERLEC1        | 0,043174936 | RP11-453N18.1 | 0,03173172 | ZFYVE16      | 0,0050972 |
| TBL1X         | 0,00200838 | RP4-647C14.2  | 0,035702388 | HIBCH         | 0,00103305 | LINC01480    | 0,0456812 |
| COQ6          | 0,02382428 | GOLGA7        | 0,039045649 | TIMM10        | 0,00090486 | LOC100505635 | 0,0055475 |
| LSP1          | 0,00109109 | RP11-13K12.1  | 0,007010401 | MED17         | 0,03113628 | TBC1D22A     | 0,0061154 |
| SYK           | 0,03224205 | RP11-706O15.5 | 0,000501132 | TMPRSS5       | 1,2408E-05 | FRG1JP       | 0,0001024 |
| PAMR1         | 0,02395171 | TLE1          | 0,001817328 | ATP6V1E2      | 0,01359047 | CTB-35F21.1  | 0,0001711 |

### Lesion specific genes

|               |            |                |             |            |            |              |           |
|---------------|------------|----------------|-------------|------------|------------|--------------|-----------|
| TMEM109       | 0,02343938 | TBCA           | 0,042200509 | ATAD3C     | 0,00069523 | AC069213.1   | 0,0083615 |
| NALCN-AS1     | 0,04677779 | RASGRF2-AS1    | 0,020581091 | GDPD3      | 0,01326882 | PRRG3        | 0,0328083 |
| ST14          | 0,03608934 | ARHGAP19-SLIT1 | 0,02854827  | FIGNL1     | 0,04967924 | LY6G5B       | 0,001337  |
| CARD8-AS1     | 0,0481232  | RIBC2          | 1,22972E-11 | SNORA74B   | 0,02899769 | PRDM5        | 0,0112269 |
| DDX51         | 0,02446922 | AF064858.8     | 0,022229656 | CEP76      | 0,02599721 | KCNV1        | 0,0191657 |
| HLA-DMA       | 0,012064   | HK2            | 0,037300979 | LINC01315  | 0,01193797 | RP1-228H13.5 | 0,001474  |
| HLA-B         | 0,01184322 | LOC101929227   | 0,02808226  | LOH12CR2   | 0,00215381 | PTGFRN       | 0,0200268 |
| PTP4A1        | 0,00497121 | RP11-160H12.2  | 0,012441109 | ABCA17P    | 0,00059255 | SLC9A7P1     | 0,0003099 |
| PYGM          | 0,03273387 | LILRB5         | 4,20472E-10 | CBWD3      | 0,0061583  | NEUROD6      | 0,0141977 |
| CSF1R         | 0,03439734 | CFAP161        | 4,69926E-07 | CORIN      | 0,01810447 | CEACAM19     | 0,0333296 |
| AOAH          | 0,0377567  | AC022154.7     | 0,049560149 | SNHG17     | 0,04160418 | FAM214B      | 0,0021998 |
| SLC25A53      | 0,04066255 | SERPINE1       | 0,010313313 | SMU1       | 0,03473954 | C20orf194    | 0,009485  |
| NADK2         | 0,04052753 | FAM124B        | 4,0233E-08  | RASD1      | 0,02497606 | TNRC6C-AS1   | 0,0018153 |
| A2ML1         | 0,0377567  | USHBP1         | 0,019143109 | MRPL40     | 0,00012237 | NDUFA12      | 0,0081188 |
| RP11-876N24.4 | 0,00207694 | RP11-16L9.2    | 0,000478769 | LY6H       | 0,03599562 | TCF20        | 0,0242394 |
| BAMBI         | 0,02379351 | SDR42E2        | 0,000344583 | NOS3       | 0,02650466 | TMEM272      | 0,0229294 |
| LTBP1         | 0,01426926 | SPAAR          | 0,028026286 | ETAA1      | 0,04604596 | ELMOD3       | 0,00503   |
| TRIL          | 0,01961847 | SAMMSON        | 0,032729861 | TMEM198    | 0,02446563 | OIP5-AS1     | 0,0143313 |
| BRSK1         | 0,01629031 | MLPH           | 8,44727E-08 | C1orf226   | 0,01927274 | GPR63        | 0,0001102 |
| SMCO4         | 0,00066389 | C8orf34-AS1    | 3,2306E-06  | PI4KAP2    | 0,008622   | TMEM232      | 0,0203248 |
| PLEKHO2       | 0,02023595 | HSPG2          | 0,016220146 | C9orf170   | 0,00125841 | PPP1R21      | 0,0010016 |
| HCG27         | 0,01629031 | SUCLA2         | 0,034155537 | RBMX       | 0,00931982 | CHRM3        | 0,0187731 |
| SF3B2         | 0,03224205 | RAD51AP1P1     | 0,018648045 | CTNNAL1    | 0,00994056 | NEK9         | 0,009416  |
| RP11-429G19.3 | 0,0301369  | RP11-262H14.3  | 0,000458732 | HERC4      | 0,03343116 | RIMKLA       | 0,0028878 |
| LPAL2         | 0,04570502 | RP11-662G23.1  | 0,028408636 | PEMT       | 0,02724413 | PDCL3P5      | 0,0137912 |
| NUFIP1        | 0,02355352 | RP3-342P20.2   | 0,025485665 | PARP3      | 0,0278114  | IGSF6        | 0,0130129 |
| PTTG1IP       | 0,03070386 | RPL19          | 0,049175766 | CATSPERE   | 0,02619584 | HAUS7        | 0,034441  |
| ARHGAP26-IT1  | 0,00019564 | AQP9           | 0,000434136 | NDUFA3     | 0,0417428  | ATP2B3       | 0,0167965 |
| EBI3          | 0,01879923 | ST8SIA6-AS1    | 0,000226895 | KYAT3      | 0,03753015 | KDEL2        | 0,0126896 |
| VSTM2B        | 1,5808E-05 | FAM98A         | 0,028673912 | SNX24      | 0,02471678 | RPN2         | 0,0448788 |
| ADA2          | 0,01360221 | ISM1           | 0,022580435 | RASL11A    | 0,00502233 | MARS2        | 0,0027151 |
| RP11-39M21.2  | 0,00211012 | CTC-369A16.2   | 0,038718264 | AC009120.4 | 0,01824358 | IGFBP3       | 0,0158554 |
| ISLR          | 0,01541577 | RP11-147L13.2  | 0,000876201 | LRRC37A    | 0,0035374  | UPF2         | 0,0074247 |
| AGAP6         | 0,00673578 | RP11-82O19.2   | 0,049744988 | PCDHGA6    | 0,01954826 | ARHGAP24     | 0,0062172 |
| TMEM38B       | 0,03718744 | TNFAIP6        | 8,37795E-07 | PAM16      | 0,00521707 | JPH1         | 0,0004173 |

### Lesion specific genes

|               |            |               |             |               |            |              |           |
|---------------|------------|---------------|-------------|---------------|------------|--------------|-----------|
| PATL2         | 0,00165875 | LINC01597     | 0,003821292 | CCDC112       | 0,02452143 | EFR3A        | 0,0148725 |
| ST5           | 0,02549521 | RP11-1319K7.1 | 0,020196064 | MTMR11        | 0,00783028 | LOC283922    | 0,0199892 |
| ZNF143        | 0,02926233 | CD8A          | 4,69207E-07 | ALDH9A1       | 0,01599468 | SLIT2        | 3,236E-05 |
| ICA1          | 0,00928084 | AC019048.1    | 0,014637655 | RP1-68D18.2   | 0,00429451 | LINC02473    | 0,0101297 |
| MX1           | 0,002603   | CYP4F12       | 0,037762066 | SLC18B1       | 0,01335838 | HMGXB3       | 0,0160724 |
| ZNF564        | 0,01804338 | HERC3         | 0,010121614 | SLC27A5       | 0,04574963 | LINC00663    | 0,002149  |
| LAMB2         | 0,01058034 | CD72          | 0,000382123 | C11orf54      | 0,04418923 | ZNF804A      | 0,0407332 |
| CFLAR         | 0,04990528 | LYPLA1P3      | 0,010618885 | PRKAG1        | 0,01659769 | GDF7         | 0,0199533 |
| RP11-469A15.2 | 0,04025389 | VEGFA         | 0,018159378 | ZNRF1         | 0,00027904 | KCNJ16       | 0,0134274 |
| TMEM107       | 0,0287028  | RP11-433A10.2 | 0,024153044 | ERVH48-1      | 0,00239539 | PTDSS2       | 0,022797  |
| TEX29         | 0,0464215  | APOBEC3F      | 5,82611E-05 | DCAF8         | 0,03307092 | RAPGEF4-AS1  | 0,0025726 |
| RP4-657E11.10 | 0,04242835 | ADAMTS6       | 0,042569658 | HPSE2         | 0,00059737 | SLC25A23     | 0,0001955 |
| CYBA          | 0,03267142 | ALG1L6P       | 0,034208901 | RP11-355B11.2 | 0,02810256 | SETD4        | 0,0125428 |
| CTNND2        | 0,02986886 | LINC00900     | 0,000823578 | RP11-927P21.1 | 0,0351101  | RHOBTB1      | 0,0262755 |
| TRIM22        | 0,00051964 | MSC-AS1       | 0,042375642 | HSD17B1       | 0,00353886 | CHPF         | 0,0319516 |
| HLA-E         | 0,01192155 | RP11-986E7.7  | 0,000417005 | ARAP1-AS2     | 0,00592642 | KRR1P1       | 0,0218752 |
| PODXL2        | 0,01496036 | ATP5A1        | 0,03109209  | IMP4          | 0,01292624 | RP11-495K9.5 | 0,0069162 |
| SFSWAP        | 0,01025382 | RP11-483L5.1  | 0,008305943 | CHRM5         | 0,03330491 | NRG3-AS1     | 0,0012457 |
| RP3-476K8.3   | 0,02848875 | PTPRQ         | 0,000115222 | FGFR1         | 0,00272402 | ZNF214       | 0,0002336 |
| AGAP9         | 0,02827061 | AC002366.3    | 0,042069579 | SCAMP1-AS1    | 0,00010102 | MRPS18B      | 0,0044626 |
| RCOR2         | 0,02175404 | HEATR9        | 0,047751268 | ACSBG2        | 0,0255969  | RPL14        | 0,0185449 |
| C4orf19       | 0,00708929 | PKHD1L1       | 0,00049145  | GPC5          | 0,04333485 | TMEM208      | 0,0002844 |
| MARVELD1      | 0,01925316 | CEBPA-AS1     | 0,001975154 | AC005003.1    | 0,02155049 | ILF3-AS1     | 0,0014764 |
| RP11-319G9.3  | 0,01565085 | PEG3          | 0,029128105 | DCP1A         | 0,00121543 | DDX20        | 0,0079917 |
| CCSAP         | 0,02346138 | STK32B        | 0,039204166 | RP11-286N22.8 | 0,04591011 | TBC1D8B      | 0,0159738 |
| AC144835.1    | 0,00440599 | CFAP65        | 7,13126E-05 | SPIRE2        | 0,03837233 | FAM92A       | 0,0077615 |
| RP11-152L20.3 | 0,00688868 | PIGU          | 0,044811327 | RBPJ          | 0,01765998 | SYT4         | 0,0115594 |
| CCL2          | 0,01037828 | PRNCR1        | 0,02946465  | GTF2IP4       | 0,01850351 | GPR75        | 0,0003776 |
| ZNF192P1      | 0,00035775 | C20orf96      | 0,014847739 | ALDH2         | 0,00549177 | PCDHGA3      | 0,0017118 |
| KIAA0040      | 0,0371658  | AC009110.1    | 0,006740666 | RP11-1148L6.5 | 0,03802302 | SLC38A11     | 0,0004214 |
| NSUN2         | 0,03954666 | UBR4          | 0,03175098  | OTUD4         | 0,02936789 | NSUN4        | 0,0256416 |
| ATP5O         | 0,04507683 | RBM48         | 0,004075885 | LOC101928725  | 0,00013211 | ANKZF1       | 0,0439955 |
| S100A4        | 0,01368231 | CCNA1         | 0,045436321 | RACGAP1       | 0,04738957 | TRMT2A       | 0,0412475 |
| DNMT1         | 0,03100266 | ID3           | 0,023947787 | C14orf132     | 0,00339516 | MEF2C        | 0,0002251 |
| FMNL3         | 0,0075031  | HSD17B3-AS1   | 0,011880217 | DHFR2         | 1,1563E-05 | AFF3         | 0,0089704 |



### Lesion specific genes

|              |            |               |             |                 |            |               |           |
|--------------|------------|---------------|-------------|-----------------|------------|---------------|-----------|
| CTC-525D6.1  | 0,03212252 | PLAC9P1       | 0,001811934 | DAO             | 5,7648E-05 | ERBB4         | 0,0368227 |
| PLA2G15      | 0,04593789 | NRM           | 0,025310188 | BDH2            | 0,00052031 | RP11-689P11.2 | 0,0180804 |
| ZNF69        | 0,04677779 | CCNL2P1       | 0,044643681 | AC024560.3      | 0,03917322 | IL12RB1       | 0,0388208 |
| SASH3        | 0,03290614 | PRR29         | 0,003885929 | BACE2           | 0,00253813 | RP11-351I21.6 | 0,0262771 |
| NAP1L4P1     | 0,00363092 | SHISA3        | 0,004937386 | LOC103611081    | 0,01632687 | MPPED2        | 0,0118126 |
| HIST1H4F     | 0,00197494 | CD36          | 4,17543E-09 | CLSTN2          | 0,04275022 | CHRDL1        | 0,0030738 |
| ST6GAL2      | 0,04634891 | XRCC6         | 0,002165324 | STK40           | 9,4532E-05 | TAF4B         | 0,0122167 |
| RUSC1-AS1    | 0,01252419 | ADGRF5P1      | 0,001257758 | CBARP           | 0,04323594 | GAL3ST3       | 0,0495318 |
| PTGS1        | 0,01787491 | LINC01695     | 0,003953483 | CTAGE3P         | 0,0006496  | STARD4-AS1    | 0,0163225 |
| RP11-250B2.5 | 0,03544715 | TCF12         | 0,007358049 | PHF1            | 0,01495944 | FBXO16        | 7,015E-05 |
| NDUFS7       | 0,02272735 | EIF4EP1       | 0,030869924 | FBXO36          | 0,01169284 | TUBGCP3       | 0,0213803 |
|              |            | RP11-174O3.3  | 0,001543112 | MTR             | 0,01853292 | CLGN          | 0,0397779 |
|              |            | RP1-117O3.2   | 0,008519368 | RSPO2           | 0,03318799 | SMARCC2       | 0,0017183 |
|              |            | ILK           | 0,028233102 | PGM2L1          | 0,03587278 | RAD51B        | 0,0498147 |
|              |            | AC005162.5    | 0,016220146 | ANKRD52         | 0,04240639 | DGCR9         | 0,0022057 |
|              |            | RASA4         | 0,018207167 | PPL             | 0,02830498 | ARHGAP17      | 0,0359746 |
|              |            | LOC101926933  | 0,006646877 | TIPIN           | 0,00035972 | LINC02495     | 0,0001968 |
|              |            | AC007405.4    | 0,036222554 | BAALC-AS1       | 0,02980848 | KCNT1         | 0,0085116 |
|              |            | NDUFA4        | 0,03612735  | SLC25A18        | 0,00021144 | TMEM127       | 0,0096159 |
|              |            | SOX17         | 0,00932432  | PDSS1           | 0,02531382 | THAP11        | 0,0487792 |
|              |            | AXDND1        | 0,039397206 | PGAM1           | 0,03389198 | NEK4          | 0,0232359 |
|              |            | NEUROD1       | 0,045593865 | AC098617.1      | 0,00711883 | CACNA1E       | 0,0223023 |
|              |            | SENCR         | 0,001492466 | PMS2P4          | 2,8526E-05 | PAFAH1B1      | 0,0129263 |
|              |            | NDFIP2        | 0,044930381 | RN7SL752P       | 0,00217667 | RP11-203J24.8 | 0,0013381 |
|              |            | VDAC3         | 0,046381399 | PARK7           | 0,033719   | CNTN4         | 0,002772  |
|              |            | RP11-607P23.1 | 0,009090245 | PSMD8           | 0,04365612 | CTD-2303H24.2 | 0,0035693 |
|              |            | ANP32C        | 0,001482499 | TRAPPC2         | 0,02616314 | SLC25A1       | 0,0019657 |
|              |            | PODNL1        | 0,000138673 | MSANTD3         | 0,01003162 | PELO          | 0,0480881 |
|              |            | FUT1          | 0,025157733 | PTGES3P1        | 0,04421132 | SYT5          | 0,0301895 |
|              |            | NOP56         | 0,031129959 | ANKHD1-EIF4EBP3 | 0,03770908 | RP11-650J17.1 | 0,0107465 |
|              |            | NLN           | 0,020581091 | AC003080.4      | 0,00794179 | TIPARP        | 0,010512  |
|              |            | GK3P          | 0,048039004 | TRAPPC5         | 0,00117648 | PGAP2         | 2,024E-05 |
|              |            | MIR142        | 0,002250841 | PRDM6           | 0,03287601 | IPO8          | 0,0257972 |
|              |            | NR5A2         | 0,000634382 | RP11-327P2.5    | 0,01449876 | ITPKB-IT1     | 0,0330598 |
|              |            | ODAPH         | 0,011254441 | SLCO1B1         | 0,03525562 | CCSER1        | 0,0073241 |

### Lesion specific genes

|               |             |              |            |               |           |
|---------------|-------------|--------------|------------|---------------|-----------|
| NLGN1         | 0,009311296 | KCNN3        | 0,00431628 | NEFM          | 0,0121989 |
| HELLS         | 0,042967161 | RP11-274H2.5 | 0,02926919 | SYN1          | 0,0460267 |
| COL18A1-AS1   | 0,018272515 | IGFN1        | 0,00316483 | VSNL1         | 0,023408  |
| CNTNAP2       | 0,01530864  | RP1-146A15.1 | 0,02861851 | CCDC186       | 0,0115953 |
| BSCL2         | 0,029322235 | C10orf143    | 0,03702735 | LRRC4         | 0,0023163 |
| SOCS2         | 0,048407092 | ABHD18       | 0,01698083 | ZNF318        | 0,0167259 |
| NKAIN2        | 0,009146387 | DOCK4        | 0,02445657 | STRIP2        | 0,0039845 |
| RP11-554D20.1 | 0,035032008 | WVOX         | 0,00430867 | GRIN2C        | 0,0468028 |
| TTC6          | 4,63305E-07 | CTSF         | 0,01448253 | DCUN1D3       | 0,0199811 |
| CTD-2058B24.3 | 0,005955886 | BNIP1        | 0,00061089 | DPYD-AS2      | 0,0200945 |
| MAPK15        | 5,94811E-07 | DLL4         | 0,04027791 | CROT          | 0,0449388 |
| ARSE          | 0,002476198 | RN7SKP154    | 0,00190838 | MTND4P12      | 0,0034413 |
| ACOT4         | 0,034155537 | SLA2         | 0,00907576 | ESRRG         | 0,0027393 |
| MTCO1P15      | 0,008716895 | GPR79        | 0,00331559 | CDR2          | 0,0129219 |
| CCDC89        | 0,002313149 | ZC4H2        | 0,01269935 | GPR12         | 0,0097222 |
| ATP5E         | 0,020846635 | GGACT        | 0,01583616 | FAR2          | 0,010043  |
| PPP1R26-AS1   | 0,040293824 | SIRT7        | 0,04327469 | PDRG1         | 0,0051642 |
| IGKV4-1       | 2,64929E-76 | PPIL3        | 0,01495944 | STRADA        | 0,0108238 |
| KLHL3         | 7,76298E-05 | IGF2BP2      | 0,04128916 | RNF2          | 0,0232384 |
| CES1          | 0,004492323 | BPNT1        | 0,02379215 | ABCD2         | 0,0305698 |
| PTGIS         | 0,001328809 | CCNJ         | 0,01328229 | TM2D3         | 0,0224067 |
| LOC100506384  | 0,011395328 | IQCE         | 0,0266369  | PEAK1         | 0,0183823 |
| SLC52A1       | 0,000106396 | NIPSNAP2     | 0,00152279 | EYA1          | 1,622E-05 |
| NPM1P18       | 0,004153331 | PGAP1        | 0,02745984 | WDR17         | 0,0401297 |
| CLCC1         | 0,042179931 | SRPX2        | 0,00241755 | CLCN2         | 0,0482449 |
| CLTA          | 0,009764721 | AKAP12       | 0,00045755 | ANXA6         | 0,005392  |
| BISPR         | 1,55413E-06 | TNKS1BP1     | 0,02208658 | RP1-257A7.4   | 0,0266335 |
| RPS7P7        | 0,001960063 | LIPG         | 0,00012476 | PPHLN1        | 0,0078773 |
| IGHG2         | 1,45681E-14 | DENND6A      | 0,03819407 | AC144521.1    | 0,0012303 |
| RP11-455F5.3  | 0,026767867 | TUBA1C       | 0,00245684 | DLG4          | 0,0379697 |
| DNMT3B        | 0,035703508 | ZFYVE28      | 0,00735099 | RP1-86D1.5    | 0,0147373 |
| TRIP12        | 0,049710288 | SEMA6D       | 0,00092892 | CTD-2516F10.2 | 0,0254699 |
| RP11-575L7.4  | 0,002532807 | MAPK13       | 0,00746029 | ELN           | 0,0189198 |
| BRD8          | 0,031103542 | PCDHGB9P     | 0,0021481  | RNF19B        | 0,0322923 |
| TIAM1         | 0,037962164 | RP11-792A8.3 | 0,04499469 | MPI           | 0,0095459 |

### Lesion specific genes

|               |             |               |            |              |           |
|---------------|-------------|---------------|------------|--------------|-----------|
| SYTL1         | 1,59485E-05 | CALM2P2       | 0,02019411 | TLR8         | 0,0361948 |
| DDX24         | 0,009688966 | LINC00910     | 0,00038439 | PCDHA9       | 0,0170832 |
| TMEM170A      | 0,021273171 | NSMCE1        | 0,00586154 | RRAGA        | 0,0183343 |
| RP11-685N10.1 | 0,000498567 | SETD1B        | 0,02198035 | MAML3        | 0,0327231 |
| RASAL3        | 0,04259663  | ZNF606        | 0,02202634 | FAM229B      | 0,0178579 |
| PRKACB        | 0,008614104 | SNRNP35       | 0,01025636 | PHF19        | 0,0285815 |
| BICRA-AS1     | 0,005978186 | SH3GL1P1      | 0,00452947 | CTD-3185P2.1 | 0,0073957 |
| RP11-72L22.1  | 0,000885306 | SMTN          | 0,00632803 | PPP2R5C      | 0,0060149 |
| HERC1         | 0,015999255 | DDX59         | 0,03219063 | FAM155A-IT1  | 0,0062398 |
| COPS6         | 0,020630372 | RP11-259K15.2 | 0,0208338  | SIPA1L1      | 0,0034104 |
| RP11-405O10.2 | 0,008335683 | RP3-467L1.6   | 7,0267E-05 | OXR1         | 0,0492649 |
| TAS2R31       | 0,029157284 | TMEM262       | 0,03484957 | DGKB         | 0,0003435 |
| ANKUB1        | 0,002051482 | C18orf32      | 0,01064046 | RP11-397O4.1 | 0,0102438 |
| RP11-573N10.1 | 0,046671722 | PLPP3         | 0,03467134 | HK1          | 0,0213476 |
| RP11-380G5.3  | 0,047751268 | APH1B         | 0,00074822 | VPS33B       | 0,0094253 |
| NARF          | 0,048793026 | F5            | 0,04584406 | SLC35G1      | 0,0293339 |
| JAML          | 3,38809E-10 | AC002310.12   | 0,01143345 | CDK5R2       | 0,0237771 |
| MTMR4         | 0,012465071 | HINFP         | 0,00121539 | WAS          | 0,0097982 |
| PRICKLE4      | 0,000143688 | RP11-669E14.4 | 0,00674501 | ARHGEF18     | 0,0160851 |
| PALM3         | 1,91565E-23 | PPP1R1A       | 0,00416002 | RUNDC3B      | 0,0019822 |
| LINC02097     | 0,026418079 | RP11-234A1.1  | 0,04971546 | RP5-926E3.1  | 5,403E-10 |
| XIST          | 2,01526E-05 | SMG1P7        | 0,01395373 | CDH6         | 2,643E-06 |
| PLEKHG4B      | 2,95959E-10 | AFTPH         | 0,00778472 | POLR3E       | 0,0010963 |
| FBP1          | 0,031787376 | COLGALT1      | 0,01991208 | AC004019.10  | 0,0063335 |
| SELENOI       | 0,04815844  | FAM228A       | 0,03078652 | GABRA2       | 0,0004525 |
| PITPNM2-AS1   | 0,03218875  | ZFAND2A       | 0,01025373 | SEMA5A-AS1   | 0,0107072 |
| PSMD4         | 0,032934978 | PWWP2B        | 0,01244136 | DENND5B      | 0,0044459 |
| MICU2         | 0,046478649 | HSDL2         | 0,00562888 | RPL7L1P2     | 0,0008197 |
| CTD-3138B18.5 | 0,00441953  | SEMA6B        | 0,04335037 | LCA5         | 0,0233738 |
| CA3           | 0,01722657  | AKR1A1        | 6,2272E-05 | RDH16        | 0,0020668 |
| SNORD99       | 0,001366647 | LINC01135     | 0,0203803  | TTC7A        | 0,017591  |
| EME1          | 0,026477349 | ENGASE        | 0,01095312 | CTD-2002H8.2 | 0,0420435 |
| BRCC3P1       | 0,049744988 | INO80         | 0,00560141 | RPL6         | 0,0295374 |
| KIRREL3       | 0,005170033 | PGS1          | 0,04614779 | BRINP1       | 0,0295498 |
| RPL37A        | 0,018784254 | HAP1          | 0,00839447 | ABLIM2       | 0,0088659 |

### Lesion specific genes

|               |             |                |            |              |           |
|---------------|-------------|----------------|------------|--------------|-----------|
| RABL2B        | 0,024470396 | AF129075.5     | 0,00599805 | JAZF1        | 0,0137973 |
| HAPLN3        | 0,032112533 | MEP1B          | 0,00538449 | RP11-116N8.4 | 0,0428186 |
| NSUN7         | 0,01589474  | BCAS3          | 0,0208338  | ARFIP2       | 0,0447144 |
| SLCO5A1       | 0,042017975 | HSD17B6        | 0,00492431 | POLQ         | 2,13E-05  |
| RAMP2-AS1     | 0,027330011 | FAM45A         | 0,01964948 | MRPS30       | 0,0181395 |
| ATP8B3        | 0,01901518  | EFCAB11        | 0,00801069 | FFAR1        | 0,0001529 |
| GPR68         | 0,047303978 | TMEM54         | 0,00867639 | SLITRK6      | 0,0326988 |
| PMP22         | 0,014035427 | PITPNM1        | 0,0136181  | ORAOV1       | 0,0208657 |
| RP11-70J12.1  | 0,009753971 | LINC01184      | 0,00369099 | KCTD9        | 0,0052682 |
| PSPHP1        | 5,30447E-05 | RP11-1055B8.4  | 0,0056016  | ERG28        | 0,0178064 |
| SNORA35B      | 0,01088025  | MATR3          | 0,032714   | TLR3         | 0,0469174 |
| PZP           | 0,001926688 | SPTLC1         | 0,03404479 | FGF14        | 0,0009895 |
| MTND5P14      | 0,036359818 | ODF3           | 0,01645271 | CSRNP3       | 0,0068191 |
| RP3-406A7.7   | 0,004336864 | NUP210L        | 0,03149477 | GLRA3        | 0,000796  |
| C11orf70      | 9,36269E-10 | METTL8         | 0,01062673 | POLR2D       | 0,0035281 |
| EPHB4         | 0,024870336 | CTD-2380F24.1  | 0,02619584 | KANSL1L      | 0,008655  |
| HSPA12A       | 0,022169585 | RNF141         | 1,67E-05   | C4orf50      | 0,0096436 |
| SLFN12L       | 1,9485E-10  | DLGAP4-AS1     | 0,03031188 | RP11-97C16.1 | 0,0406942 |
| RPL39L        | 0,001474071 | RP11-535M15.2  | 0,04630021 | CACNA2D3     | 0,0184929 |
| TEX45         | 0,03583583  | RP11-400F19.18 | 0,0432237  | GFM2         | 0,0034139 |
| PLAU          | 4,49298E-06 | DAP3           | 0,03326368 | LANCL3       | 0,0153133 |
| SAMD3         | 0,005820955 | LINC02232      | 0,03030025 | RBM12        | 0,0116369 |
| NXPH3         | 0,027347668 | EIF2B3         | 0,02299921 | MYH14        | 0,0053722 |
| POU3F4        | 0,017710194 | RPA2           | 0,04247022 | IFITM3       | 0,0292803 |
| TTL6          | 0,001909221 | MXD4           | 0,00181157 | RP11-58H15.1 | 0,0011474 |
| TMEM159       | 0,021640147 | NABP2          | 0,01470879 | HRH3         | 0,0255259 |
| CDKN2B-AS1    | 0,000762832 | ULK1           | 0,02466118 | PSAP         | 0,0345291 |
| LINC01719     | 0,049828922 | SLC2A3         | 0,00544534 | CHM          | 0,0059484 |
| GJB3          | 0,018355585 | ACOX1          | 0,03538957 | FAM105A      | 0,0240126 |
| IL13RA2       | 0,007287165 | GS1-358P8.4    | 0,04062356 | ZNF619       | 0,0163293 |
| VWF           | 0,04409998  | TTYH3          | 0,01349018 | RP11-785H5.2 | 0,0082364 |
| BMP4          | 9,40823E-05 | CAMK2D         | 0,01001374 | LOC100128239 | 0,0020319 |
| RP11-303E16.5 | 0,049257464 | HIST1H2BC      | 0,04899864 | RP11-580I1.2 | 0,0468161 |
| RPH3AL        | 0,011804425 | RP11-526I2.5   | 0,01583435 | DNASE2       | 0,0338172 |
| SH3TC1        | 0,013825472 | E2F1           | 0,02940786 | LGMN         | 0,0229338 |

### Lesion specific genes

|               |             |               |            |              |           |
|---------------|-------------|---------------|------------|--------------|-----------|
| GRIA3         | 0,040140712 | LINC00987     | 0,04477991 | MTA3         | 0,0104236 |
| CTA-221G9.11  | 0,000556306 | MRPL54        | 0,00434156 | CDH22        | 0,0017847 |
| C5orf58       | 0,001428924 | SIPA1L2       | 0,00707386 | INA          | 0,0052084 |
| COL13A1       | 0,00081441  | GNB1L         | 0,00372944 | DGKI         | 0,0252663 |
| FAM86B2       | 0,036246784 | ECM1          | 0,04107816 | FAM136A      | 0,0414287 |
| SNAPIN        | 0,033793717 | FOXJ2         | 0,01044369 | ENPP5        | 0,0054379 |
| CCDC114       | 6,98356E-09 | RNF219-AS1    | 0,01247926 | RP1-269M15.3 | 0,0025308 |
| AP004372.1    | 0,019597247 | EGFL7         | 0,03690342 | RBM42        | 0,0328157 |
| HLA-DRB6      | 3,72523E-05 | LRRC66        | 0,01271819 | MBNL1        | 0,0347536 |
| TPD52         | 0,014597767 | DNAJC9-AS1    | 0,01181404 | NUP160       | 0,0433491 |
| AC007362.3    | 0,003549511 | CCDC120       | 3,4218E-05 | FGF14-IT1    | 0,0002    |
| EFCAB10       | 7,09964E-05 | CTC-487M23.5  | 0,00087175 | NAXD         | 0,021653  |
| MESTIT1       | 0,001915435 | RHNO1         | 0,00654114 | CYP2D7       | 0,015062  |
| MAGI2         | 0,007872497 | MAPT-AS1      | 0,02069248 | SRP14-AS1    | 0,0382906 |
| STX12         | 0,036615124 | CNRIP1        | 0,04694821 | PAFAH2       | 0,0199497 |
| RP11-113K21.1 | 0,017241439 | UNC13D        | 0,0230488  | KCNQ2        | 0,0177755 |
| PSD2-AS1      | 0,020134397 | PPP1R3B       | 0,02318484 | HTATIP2      | 0,0485076 |
| MS4A4E        | 4,5719E-06  | FHL2          | 0,03009082 | LINC01137    | 0,0028263 |
| KIAA1468      | 0,035407462 | LPCAT2        | 0,02425387 | EPHA6        | 0,0002432 |
| LINC02301     | 0,040299184 | LOC389831     | 0,04246244 | COA6-AS1     | 0,0034993 |
| LINC01992     | 0,000219245 | CYC1          | 0,0431857  | DPH2         | 0,0050733 |
| LINC00426     | 3,47302E-07 | RPL22         | 0,02268312 | SLC20A1      | 0,0393895 |
| PPP1R12BP1    | 0,027222487 | SPATA6        | 0,00833123 | LDB2         | 7,236E-06 |
| ADH6          | 2,99415E-05 | ALDH1B1       | 0,0481726  | SPTB         | 0,0284385 |
| RP11-298D21.2 | 0,010105238 | SPEN          | 0,03755718 | EFNB2        | 0,042167  |
| PSMB1         | 0,042161516 | TTC32         | 0,02178525 | ITPK1-AS1    | 0,000608  |
| RN7SL344P     | 0,01641357  | MIDN          | 0,04991756 | PATZ1        | 0,0036483 |
| HKDC1         | 7,65086E-06 | FRAT2         | 0,03552329 | SHISA9       | 0,0001293 |
|               |             | RP11-799M12.2 | 0,01020412 | VWA7         | 0,013318  |
|               |             | PGM5P2        | 0,01746507 | ANKRD29      | 0,0016826 |
|               |             | RP11-678G15.2 | 0,03057329 | LINC00926    | 0,0228291 |
|               |             | TJP1          | 0,03071263 | PC           | 0,0350768 |
|               |             | PRMT6         | 0,00053819 | PAK5         | 0,0003985 |
|               |             | MSANTD1       | 0,03296692 | PDZRN4       | 0,0002557 |
|               |             | SLC17A7       | 0,04088327 | COMMD3       | 0,0294777 |

### Lesion specific genes

|               |            |              |           |
|---------------|------------|--------------|-----------|
| SERPINF2      | 0,00092567 | MAP2         | 0,0056527 |
| IQCB1         | 0,02329596 | PANX2        | 0,0002243 |
| CCDC62        | 0,04692824 | ZNF280B      | 0,0146763 |
| RAPGEF4       | 0,03095689 | FAM210A      | 0,000266  |
| MAZ           | 0,04150318 | TMEM201      | 0,0205015 |
| DCTN6         | 0,01930639 | SLC12A5      | 0,0493144 |
| RP11-304F15.3 | 0,00044054 | WDR76        | 0,0001549 |
| RPL17P50      | 0,00116429 | OTOGL        | 0,0147281 |
| KCNJ14        | 0,0258398  | DSCR3        | 0,0001628 |
| HSP90AA1      | 9,964E-05  | ADAMTS13     | 0,0306316 |
| THSD7B        | 0,03291138 | TTYH1        | 0,0233873 |
| BX322557.10   | 0,03552329 | IGFL3        | 0,0077293 |
| SLCO4A1       | 6,9359E-08 | WDR5         | 0,0406456 |
| GLUD1         | 0,00254682 | ACVR1B       | 0,0113599 |
| LINC01852     | 0,03531599 | FAAP100      | 0,0423372 |
| PML           | 0,02645289 | ILVBL        | 0,0296473 |
| UROD          | 7,23E-05   | MATN2        | 0,0153125 |
| LRP6          | 0,02821286 | MPP3         | 0,0019152 |
| LINC00609     | 0,04452339 | ARHGEF6      | 0,0404823 |
| CLCA4         | 0,04634405 | CIB1         | 0,0278642 |
| MLLT1         | 0,00799279 | CIT          | 9,705E-05 |
| CSTF2         | 0,04240639 | RPL41        | 0,0401897 |
| AC006538.1    | 0,04006884 | MCM3AP       | 0,0067213 |
| METAP1D       | 0,00433481 | RP11-66N24.4 | 0,0335366 |
| SGCA          | 0,02320849 | ACSL6        | 0,0364194 |
| JMY           | 0,04851195 | CHAF1B       | 0,0099876 |
| ZNF844        | 0,00830159 | KCNB1        | 1,365E-05 |
| TCAF2         | 0,03090126 | TMEM261P1    | 0,0040182 |
| LOC401127     | 1,5413E-05 | UGP2         | 0,0004086 |
| RP11-509J21.2 | 0,0063567  | PRDX3P1      | 0,0025717 |
| LINC00461     | 0,03176441 | GRM4         | 0,0039431 |
| DNAJC2        | 0,03583864 | AL592494.5   | 0,0161907 |
| LINC00271     | 2,1913E-05 | ZMAT4        | 3,048E-05 |
| TIMMDC1       | 0,02591422 | CCDC22       | 0,0028776 |
| LINC00205     | 0,002398   | GTF2IRD1     | 3,236E-05 |

### Lesion specific genes

|              |            |                |           |
|--------------|------------|----------------|-----------|
| HSP90B1      | 0,03145563 | RP11-1020A11.2 | 0,0421278 |
| C9orf131     | 0,03313904 | RP11-731J8.2   | 0,0075953 |
| GPR146       | 0,00215727 | CPSF1P1        | 0,0056039 |
| ATP6V1G1     | 0,03806921 | SLC25A15P5     | 0,0033498 |
| BANP         | 0,02155801 | GPRC5B         | 0,0069511 |
| AF127936.7   | 0,0003948  | RP11-1415C14.3 | 4,789E-05 |
| FTSJ1        | 0,01777937 | SUMO4          | 0,0158783 |
| ZCCHC8       | 0,03223516 | IFT57          | 0,0262563 |
| VN1R1        | 9,3588E-05 | RP11-276H1.3   | 0,0001477 |
| CREBRF       | 0,04473686 | LMNA           | 0,0242216 |
| INTS4        | 0,04056234 | TMEM119        | 0,0144061 |
| C8orf76      | 0,02288733 | RP11-742D12.2  | 0,0372959 |
| SPAG5-AS1    | 0,03347062 | RP11-395I6.3   | 0,0201759 |
| HSPA1B       | 4,6298E-06 | MAGED2         | 0,0144936 |
| CDK19        | 0,01672737 | GTF2IP12       | 0,0039084 |
| VWA5B2       | 0,02105284 | GTF2H3         | 0,0007811 |
| PDZK1        | 0,00146876 | LHX2           | 0,0095812 |
| CYB561D1     | 0,00273483 | B3GALT1        | 0,0001754 |
| SART3        | 0,03995321 | TRNP1          | 0,0021989 |
| RP5-890E16.2 | 0,04146403 | GAD1           | 0,0286958 |
| SNRPD3       | 0,01493024 | ZNF133         | 0,0461122 |
| FRG1B        | 0,02296756 | WAC            | 0,0075376 |
| SPCS2        | 0,03332152 | WHRN           | 0,0392806 |
| ITPKC        | 0,02481394 | PTPN13         | 0,0083249 |
| CEP152       | 0,01945503 | PPP4R4         | 0,0001668 |
| ATP5C1       | 0,00552048 | GOLT1B         | 0,0288219 |
| NTN5         | 0,00737953 | SUSD1          | 0,0010729 |
| RP11-770G2.2 | 0,04657856 | ADD2           | 0,0178579 |
| RNF13        | 0,00936299 | PKD2L2         | 0,0326988 |
| PAXBP1-AS1   | 0,00083933 | ATP2B1         | 0,0027923 |
| UBR7         | 0,04634405 | ELMOD1         | 3,396E-05 |
| GGTA1P       | 0,01086623 | ATF7IP2        | 0,0008053 |
| ARL17A       | 0,0272234  | PRR3           | 2,521E-05 |
| TMSB4X       | 0,04225308 | KANSL1-AS1     | 0,0015287 |
| RP4-535B20.1 | 0,02185883 | ARNT2          | 0,0098915 |

### Lesion specific genes

|               |            |               |           |
|---------------|------------|---------------|-----------|
| DHRS4-AS1     | 0,04666335 | ANKRD20A7P    | 0,0494071 |
| EEF1A1P19     | 0,00405843 | CIPC          | 0,0406942 |
| NPAS3         | 0,04412041 | TFIP11        | 0,0030738 |
| COL6A6        | 0,03255169 | TACC2         | 0,0029371 |
| RN7SL767P     | 0,01576754 | NAALAD2       | 0,0059926 |
| LOC101930085  | 0,0084572  | TMEM139       | 0,0041299 |
| GLIPR1L1      | 0,00373806 | GNAL          | 0,0005366 |
| CTC1          | 0,00876129 | SH3BP4        | 0,0010307 |
| TUBB1         | 0,00799279 | ANKRD13B      | 0,0404913 |
| RUBCN         | 0,03877792 | MTCO1P11      | 0,035852  |
| NUSAP1        | 0,01771537 | RP11-214K3.20 | 0,0103803 |
| BET1          | 0,0417428  | PPP1R13B      | 0,0018791 |
| IL11RA        | 0,03832645 | RP11-530N7.2  | 0,0146645 |
| HOMEZ         | 0,01788193 | CD2BP2        | 0,0187151 |
| NOS2          | 0,03802302 | FXVD6         | 0,005154  |
| RGN           | 0,00636077 | RCL1          | 0,0041421 |
| RP11-174G6.5  | 0,03638206 | B3GAT1        | 0,0217559 |
| COX15         | 0,03467134 | BET1L         | 0,0243421 |
| HEPH          | 0,01053503 | SNX2P2        | 0,0014723 |
| RP11-1060G2.2 | 0,01523489 | FRY           | 1,343E-06 |
| GEN1          | 0,00655439 | RPL17P19      | 0,0056944 |
| ZNF623        | 0,03829485 | SAAL1         | 0,0076189 |
| C1orf61       | 0,00125762 | DNAJC27-AS1   | 0,0489854 |
| LOC729970     | 0,04109953 | FAM96B        | 0,0094926 |
| HSPD1         | 0,0005228  | BSN           | 0,0408683 |
| KLHL36        | 0,01270142 | ASPRV1        | 0,0001852 |
| DESI1         | 0,01422965 | TBL3          | 0,0488192 |
| FBXL19-AS1    | 0,00804002 | CPNE5         | 0,0085503 |
| TONSL         | 0,04802815 | RP13-93L13.1  | 0,0302405 |
| AC003104.1    | 0,03326368 | PRR16         | 0,0002163 |
| RP11-536C5.2  | 0,03680812 | CES2          | 0,0436317 |
| LIMD1         | 0,04174877 | MRPL52        | 0,0194261 |
| CRHBP         | 0,02290793 | AP000473.5    | 0,0010277 |
| RBFADN        | 0,00810386 | HS3ST1        | 0,0293637 |
| GSTM4         | 0,00114085 | METTL2B       | 0,0160635 |



## Lesion specific genes

|               |            |               |           |
|---------------|------------|---------------|-----------|
| SPTBN1        | 0,03587278 | INE1          | 0,0116864 |
| ZNF552        | 0,00049104 | RP11-259K5.2  | 0,0065766 |
| NUDT12        | 0,00975249 | C3            | 0,0304845 |
| AGT           | 0,03745657 | POLE3         | 0,0029847 |
| GLIS2         | 0,00601995 | PKIA-AS1      | 0,0160851 |
| FGF1          | 0,01844001 | NELFE         | 0,0422159 |
| NFIL3         | 0,02079305 | DLX6-AS1      | 0,0027923 |
| MED14         | 0,01081159 | RP11-588K22.2 | 0,0142465 |
| TSN           | 0,03708255 | MFSD11        | 0,0071765 |
| DUSP18        | 0,0278425  | STARD13       | 0,0156021 |
| TRMT6         | 0,03454656 | CDH10         | 0,0005631 |
| C17orf53      | 0,00996452 | RP11-968O1.5  | 0,0288712 |
| TCEA1P4       | 0,00889444 | PPP2R5A       | 0,0233138 |
| TAS2R3        | 0,0021175  | GPR19         | 0,0161344 |
| TJP3          | 0,00830159 | EBPL          | 0,0022793 |
| CYCSP34       | 0,02463862 | APOBEC2       | 0,0034915 |
| RP11-268J15.5 | 0,01542399 | OXTR          | 0,0026556 |
| BRD4          | 0,00045211 | USP19         | 0,0469416 |
| NDUFA13       | 0,01526873 | LINC01358     | 0,0349574 |
| CRYBA1        | 0,01555444 | NTAN1         | 0,0063416 |
| PRR36         | 0,03859825 | WDR6          | 0,0221838 |
| AC074289.1    | 0,03642457 | LEMD2         | 0,0104837 |
| ZNF137P       | 0,00931982 | MIS18BP1      | 0,0232676 |
| ERMAP         | 0,04773963 | CBFA2T2       | 0,046475  |
| DEFB109D      | 0,00095869 | RP11-429A20.4 | 0,0265268 |
| KLHL21        | 0,01480049 | RABEP2        | 0,0485316 |
| PI15          | 0,02069271 | LINC00938     | 0,0075781 |
| RPN1          | 0,03470531 | DKFZP434K028  | 0,0036973 |
| TFE3          | 0,00075597 | PPP1R12A      | 0,0121927 |
| SNRPC         | 0,01340772 | ZNF7          | 0,0264343 |
| GTF2IP1       | 0,03355948 | MLIP          | 0,0261335 |
| MIR17HG       | 0,02905761 | ZNF583        | 0,01884   |
| GTF2H2B       | 0,01247926 | PLXNB3        | 0,0176992 |
| GABRE         | 0,00223805 | EML5          | 0,0074445 |
| PRSS37        | 0,00199342 | NR1I3         | 0,0081149 |

### Lesion specific genes

|               |            |                |           |
|---------------|------------|----------------|-----------|
| LOC653513     | 0,00716243 | RP11-52J3.2    | 0,0431238 |
| GPX2          | 0,00060071 | RPS6KA6        | 0,0067551 |
| SPDYA         | 0,03063394 | TMEM140        | 0,016529  |
| DTWD2         | 0,00505115 | LRTM1          | 0,0023246 |
| TRAPPC6A      | 0,0140185  | SLC16A1-AS1    | 0,031496  |
| ATG3          | 0,00759518 | RASSF4         | 0,0391181 |
| TESK1         | 0,01236271 | PLA2G6         | 0,0349822 |
| TRIM24        | 0,04286163 | MRPS28         | 0,0367515 |
| ANKRD18B      | 0,02460725 | CMYA5          | 0,0027712 |
| KRT18P4       | 0,01325894 | RILPL1         | 0,0004584 |
| ZFAND1        | 0,02050084 | SIRT2          | 0,0041164 |
| DUSP3         | 0,00247783 | RP11-1280N14.3 | 0,0165907 |
| CHMP2A        | 0,03812328 | GANAB          | 0,0440555 |
| C9orf153      | 0,00016798 | NGFR           | 0,001093  |
| TLR10         | 0,00413524 | RP11-798G7.8   | 0,0058906 |
| PSMB7         | 0,01082516 | DKFZP667F0711  | 0,0463162 |
| RP11-466A19.5 | 0,02726919 | CACNA1H        | 0,0320571 |
| TRIM4         | 0,01325894 | CTC-429P9.3    | 0,0395195 |
| LHX4          | 0,00434156 | PRMT8          | 0,0233138 |
| HSP90AA2P     | 0,00982962 | TCEAL6         | 0,0011384 |
| PACS1         | 0,01259977 | ZNF827         | 0,0377594 |
| RASA2         | 0,02816997 | AURKAIP1       | 0,0142465 |
| DBI           | 0,01013877 | RP11-195C7.1   | 0,0193858 |
| RNF152        | 0,0278114  | RHCE           | 0,0249139 |
| BBS4          | 0,0048292  | C7orf49        | 0,000639  |
| ZNF544        | 0,01638887 | PANK1          | 0,0230841 |
| CDR1          | 0,00438122 | NSG2           | 0,0070348 |
| C7orf61       | 0,00117648 | PTGS2          | 0,0260288 |
| TRMO          | 0,01495944 | UBE2D3         | 0,0310186 |
| KLHL18        | 0,022774   | CTXND1         | 0,0082972 |
| RP11-736K20.5 | 0,03925639 | NEFL           | 0,0191032 |
| CRIP2         | 0,04276847 | HPGDS          | 0,0250937 |
| GPER1         | 0,03609883 | ANKRD17        | 0,0053701 |
| MPLKIP        | 0,01037637 | ATXN7          | 0,0050119 |
| CRELD1        | 0,00106664 | EPHX4          | 4,918E-05 |

### Lesion specific genes

|                |            |               |           |
|----------------|------------|---------------|-----------|
| MCM2           | 0,01993514 | ATP2B1-AS1    | 0,0253068 |
| PWP1           | 0,00145325 | LINC00174     | 0,003189  |
| BAHD1          | 0,01852649 | CTSK          | 0,0190896 |
| RP11-277A4.4   | 0,00348542 | PSIP1         | 0,0150903 |
| FSIP2          | 0,0171942  | BMP2          | 0,0138968 |
| RP11-14I17.1   | 0,04249888 | SYT7          | 0,0174261 |
| MSMO1          | 0,02836884 | CDK4          | 0,0061207 |
| CAMTA2         | 0,04953928 | BMP2KL        | 0,0133003 |
| RP11-354P17.15 | 0,00036565 | KCNAB1        | 0,0023454 |
| MAFG           | 1,061E-05  | HTR5A         | 0,0115432 |
| MAMDC4         | 0,01678176 | GRM1          | 8,153E-05 |
| DCXR           | 0,00218273 | IBA57         | 0,0010678 |
| RAB11FIP5      | 0,01326882 | PDE4D         | 0,0220308 |
| AC062029.1     | 0,00107242 | CNTN5         | 0,0015008 |
| GATA2          | 0,00699478 | GAP43         | 0,0492649 |
| TMEM50A        | 0,00190737 | GTF2IP13      | 0,0034676 |
| CCNF           | 0,01010939 | TRANK1        | 0,0012806 |
| RP5-997D16.2   | 0,00586423 | ABRACL        | 0,0419745 |
| SH3BGR         | 0,00836034 | ACAN          | 0,0401033 |
| MRPL51         | 0,02406645 | AC078842.4    | 0,0382794 |
| ARHGAP35       | 0,02192551 | ARPC1A        | 0,0002534 |
| AIG1           | 0,03518636 | FRMD4A        | 0,0408477 |
| RP11-456P18.2  | 0,00250948 | BCL11B        | 0,0029562 |
| RP5-1041C10.3  | 0,04682902 | AC011899.9    | 0,0212026 |
| SUCLG2         | 0,00039911 | PLS3          | 0,0012457 |
| RPS12P26       | 0,01312541 | PCSK2         | 0,0061501 |
| RP11-512M8.3   | 4,0403E-05 | AC010127.3    | 4,318E-05 |
| MAGED1         | 0,00203756 | RP11-314B1.2  | 0,0165036 |
| GEMIN5         | 0,04006876 | KNOP1         | 0,0147738 |
| KCNE4          | 0,00039136 | RP11-848G14.5 | 0,0232861 |
| ZBTB40         | 0,01288309 | MSTO1         | 0,0006496 |
| RP11-521I2.3   | 6,8753E-07 | CNKS2         | 4,193E-05 |
| PNP            | 0,02030624 | DNM3-IT1      | 0,0031083 |
| PIGM           | 0,01856031 | GFRA2         | 0,0013439 |
| RP11-323I15.5  | 1,6954E-06 | TMEM62        | 0,0265177 |

## Lesion specific genes

|               |            |               |           |
|---------------|------------|---------------|-----------|
| HMGB1         | 0,00575828 | LINC00478     | 0,0357816 |
| PSPH          | 0,04262573 | SMARCA1       | 0,0016969 |
| DNASE1        | 0,00103305 | GCDH          | 0,0063726 |
| QARS          | 0,0037099  | ZNF862        | 0,0370315 |
| RP11-338I21.1 | 0,01494115 | PDE7B         | 3,967E-06 |
| TRIO          | 0,00095869 | AJAP1         | 0,0373776 |
| GINS3         | 0,02904076 | RP11-422N16.3 | 0,0020607 |
| CHSY1         | 0,04637855 | RP11-981G7.6  | 0,0322371 |
| RXRA          | 0,00702311 | HACD1         | 0,0110582 |
| PDLIM7        | 0,04499469 | GPR155        | 0,0293798 |
| LINC01772     | 0,02078457 | GSG1L         | 0,0157698 |
| COG6          | 0,02288733 | GREM2         | 0,0004344 |
| ABHD4         | 0,02122449 | RP11-161I2.1  | 0,0010127 |
| PGRMC2        | 0,01021286 | MTUS2         | 0,0002994 |
| HMGB1P5       | 0,0439678  | SHC2          | 0,0003457 |
| PRTFDC1       | 0,02535176 | CASQ1         | 0,0297666 |
| RPL12         | 0,00416781 | IRAK1BP1      | 2,716E-05 |
| RP11-477H21.2 | 0,03020542 | BUB3          | 0,0170795 |
| PCDHGA7       | 0,00162262 | GGH           | 0,0182491 |
| KIF11         | 0,03494641 | GGT1          | 0,0405423 |
| ANAPC13       | 0,00830159 | HAS3          | 0,0374539 |
| HMGN3         | 0,02218107 | ME2           | 0,0137146 |
| OR7E128P      | 0,00767624 | KPNA4         | 0,0211184 |
| MPPED1        | 0,03994805 | CD302         | 0,0083553 |
| PDXK          | 0,0364257  | EFNA5         | 0,0003426 |
| PTGES3        | 0,00012024 | NOL4          | 0,0027993 |
| BCL2L2        | 0,04768843 | AAR2          | 0,0176987 |
| NEAT1         | 0,00046626 | CNTLN         | 0,0197485 |
| ATP13A4       | 0,00018939 | SASH1         | 0,0095054 |
| BCL9L         | 0,01434041 | SYNE3         | 0,0059484 |
| CSTF2T        | 0,00226166 | CACNA1C-IT3   | 0,000689  |
| RP11-443O13.3 | 0,02217614 | NGEF          | 0,0107465 |
| NAA16         | 0,00563285 | CTNNBIP1      | 0,0184908 |
| FRG1HP        | 0,00711132 | HMGN2         | 0,0093103 |
| BATF3         | 0,0048292  | MAPK1         | 0,0241315 |

## Lesion specific genes

|            |            |               |           |
|------------|------------|---------------|-----------|
| CYP4V2     | 0,01274339 | FNIP2         | 0,0331558 |
| ARNTL2     | 0,01340772 | SBF1          | 0,0019104 |
| CPA2       | 0,00022325 | LINC01197     | 0,0085868 |
| LSMEM1     | 3,7917E-07 | LINC02352     | 0,0075795 |
| PRR14L     | 0,0293601  | DCAF6         | 0,0149172 |
| GJA4       | 0,00192299 | SPI1          | 0,004656  |
| SNORC      | 0,01394783 | STIM2         | 0,0002803 |
| LINC00092  | 0,03188636 | UBE3B         | 0,0021631 |
| SRBD1      | 0,01079362 | BOK           | 0,040192  |
| NAA50      | 0,00132243 | KIF17         | 0,0077386 |
| TMEM209    | 0,00728117 | TMEM203       | 0,0346744 |
| AL450992.2 | 0,00494325 | RP11-781A6.1  | 0,0136543 |
| UBA3       | 0,01157957 | ZNF132        | 0,0142465 |
| AGK        | 0,01236271 | USF3          | 0,0297611 |
| GPRC5A     | 0,00052031 | ATP1A1-AS1    | 0,0287288 |
| GRK2       | 0,01240632 | RP11-388C12.8 | 0,0030458 |
| NAA10      | 0,01600427 | KYAT1         | 0,0123295 |
| DPH6       | 0,00037539 | POU6F2        | 0,0038991 |
| SETD5      | 0,01242756 | OPCML         | 0,0475194 |
| CLEC18B    | 0,01509192 | LINGO2        | 0,0080214 |
| TSNAX      | 0,00993203 | RN7SL648P     | 0,0146645 |
| PCID2      | 0,03423825 | KIRREL2       | 0,0479664 |
| ZCCHC3     | 0,01027331 | DIAPH2-AS1    | 0,0002006 |
| SRGN       | 0,01607859 | SLAIN2        | 0,0036483 |
| RN7SL449P  | 0,02741789 | WDR77         | 0,0410208 |
| EEF1B2     | 0,01499545 | ATF2          | 0,0039001 |
| PER3       | 0,04369629 | QTRT1         | 0,0332239 |
| DHX34      | 0,0114562  | CTC-563A5.2   | 0,0471365 |
| ERVK13-1   | 0,00080659 | U62631.5      | 0,0061359 |
| PLK4       | 0,00230445 | NRGN          | 0,0014854 |
| PLOD3      | 0,01120746 | NSUN6         | 0,0038074 |
| EXOSC8     | 0,03647428 | EEF1A1P3      | 0,0278642 |
| ATAD3A     | 0,03454656 | UXS1          | 0,0097222 |
| MCCC2      | 4,8626E-06 | SHB           | 0,0063923 |
| SPRED3     | 0,01537279 | HYLS1         | 0,001429  |

### Lesion specific genes

|              |            |               |           |
|--------------|------------|---------------|-----------|
| ISY1         | 0,02009586 | RP11-697N18.4 | 0,0057651 |
| LY6G5C       | 0,01526725 | TMEM97        | 9,209E-05 |
| BTBD6        | 0,00301058 | SUSD4         | 4,928E-05 |
| FOXP4        | 0,04673555 | EGLN2         | 0,0018012 |
| NDUFB10      | 0,00463016 | TRIM28        | 0,005723  |
| CCDC154      | 0,02642798 | FKBP15        | 0,0466763 |
| R3HCC1L      | 0,01262523 | NTNG1         | 0,0001149 |
| ZNF337-AS1   | 0,03701245 | RP1-68D18.3   | 2,032E-05 |
| LATS2        | 0,00993203 | TMEM87A       | 0,0047243 |
| GON7         | 0,00896067 | SCG3          | 0,004363  |
| WDR11        | 0,0494381  | RP11-96H19.1  | 0,0295999 |
| ZNF32-AS2    | 0,02509841 | GABRB3        | 0,0008931 |
| NUDT9        | 0,00155948 | COL6A4P2      | 0,0062613 |
| RP11-274H2.2 | 0,03111782 | GIPC3         | 0,0488094 |
| MRPL3        | 0,01554962 | TAF3          | 0,0170943 |
| POC1B-AS1    | 0,00181762 | FLRT3         | 9,414E-05 |
| SLC5A6       | 0,02303177 | RP11-343K8.3  | 0,0004468 |
| SUMO2        | 0,01729412 | ADAMTS3       | 0,0090156 |
| HIST1H2BG    | 0,03153723 | PCDHB12       | 0,0496491 |
| IL12RB2      | 0,01255374 | CLSPN         | 0,0031304 |
| SEPSECS      | 0,02810861 | SMG7          | 0,0056061 |
| BCORL1       | 0,02575993 | RP11-494K3.2  | 0,0298783 |
| FHOD1        | 0,00579095 | LSAMP-AS1     | 0,0109734 |
| TFDP1        | 0,01167229 | SYPL1         | 0,0344783 |
| FAM173B      | 0,00178025 | UNC80         | 0,0170061 |
| SAMD14       | 0,03414547 | MCUR1         | 0,0276841 |
| NPIP2        | 0,00544873 | PPA2          | 0,016671  |
| WIPI1        | 0,03254469 | MIPOL1        | 0,0074475 |
| PDZD8        | 0,01772414 | FAM53B        | 0,0134869 |
| ATG4C        | 0,03454656 | USP36         | 0,0322437 |
| ZDHHHC5      | 0,02006359 | GABRG2        | 0,0116329 |
| AJM1         | 0,02610109 | FAM78B        | 0,0005862 |
| CAV1         | 0,0375722  | IGBP1         | 0,0489478 |
| PLAGL2       | 0,00766057 | STXBP1        | 0,0024815 |
| DBN1         | 0,02892006 | ADM           | 0,0012724 |

## Lesion specific genes

|               |            |               |           |
|---------------|------------|---------------|-----------|
| ARMCX6        | 0,04132774 | TBRG4         | 0,0089656 |
| SLFNL1        | 0,02117481 | STX1B         | 0,0435338 |
| LINC02210     | 0,00168255 | ZNF620        | 0,0145627 |
| ZNF185        | 0,04388593 | RP11-466A19.1 | 0,0056981 |
| ZNF587        | 0,02700233 | MFAP1         | 0,028195  |
| HIST4H4       | 0,01219312 | GABBR2        | 0,0006052 |
| FBXO4         | 0,03296692 | KCND2         | 0,0006396 |
| RP5-1021I20.5 | 0,00039899 | RP11-395G23.3 | 0,0349061 |
| WSB2          | 0,02244789 | PIP5K1B       | 3,003E-05 |
| RP1-104O17.3  | 0,03654276 | SLC24A3       | 0,0414361 |
| ZMIZ1         | 0,03670632 | LINC00599     | 0,0423372 |
| RNF125        | 0,02034454 | AC073342.1    | 0,0003461 |
| RP11-119F7.5  | 0,02344108 | UBE3A         | 0,0249584 |
| EIF4A2        | 0,00601992 | C11orf96      | 0,0270602 |
| MALAT1        | 0,02290442 | RNF114        | 0,0025585 |
| MARS          | 0,02855203 | RAD54L2       | 0,0008631 |
| PPIE          | 0,02177282 | KCNIP2        | 0,0014279 |
| LOC100130950  | 0,01482367 | KLF13         | 0,0313996 |
| ARRDC1        | 0,04005095 | RNU6-142P     | 0,0141544 |
| OAZ1          | 0,04376748 | PFKFB4        | 9,939E-05 |
| WNT4          | 0,032714   | KRT8P42       | 0,0029532 |
| TCF7          | 0,00598255 | HIST2H2AB     | 0,0004399 |
| GKAP1         | 0,01540299 | WDYHV1        | 0,0220308 |
| RN7SL128P     | 0,01491007 | C13orf46      | 0,0079499 |
| FICD          | 0,02799422 | OLFM3         | 0,0123455 |
| RN7SL262P     | 0,02096539 | SEC61B        | 0,0475937 |
| LINC00284     | 0,04470767 | ANKMY2        | 0,0171996 |
| PDIA4         | 0,03507747 | PLEKHA5       | 0,00097   |
| AK3P3         | 0,00277849 | IGSF22        | 0,0278583 |
| DMAC1         | 0,00037467 | ETV1          | 0,0002131 |
| LOC101928445  | 0,01058548 | SPTSSB        | 0,0023096 |
| SELENBP1      | 0,03810216 | RP11-540B6.6  | 0,0007538 |
| KCTD9P1       | 0,03409197 | PPARGC1B      | 0,0023851 |
| ZNF259P1      | 0,00519795 | NME1          | 0,0391305 |
| A2MP1         | 0,04286163 | MUM1          | 0,0492424 |

### Lesion specific genes

|               |            |               |           |
|---------------|------------|---------------|-----------|
| RNF44         | 0,03553961 | RP11-384P7.7  | 0,0150795 |
| NPTXR         | 0,0210298  | PCSK7         | 0,0241212 |
| PINK1-AS      | 0,0424859  | HGS           | 0,0156224 |
| AC104135.4    | 0,00748941 | LNK1          | 0,0194499 |
| RANGAP1       | 0,01400724 | LOC101929095  | 0,016671  |
| CNOT6L        | 0,04467104 | ERC1          | 0,0002896 |
| UTP20         | 0,02851163 | NHLRC1        | 0,0146207 |
| MPL           | 0,03864109 | OR7E7P        | 0,0140303 |
| C9orf78       | 0,04513756 | COMT          | 0,025228  |
| TAS2R43       | 0,0204799  | C1orf43       | 0,0015684 |
| IGFBP3        | 0,03459797 | USP27X        | 0,0102453 |
| MTMR1         | 0,02069271 | B3GNT2        | 0,008572  |
| TSC22D1       | 0,00435861 | PPP3CB-AS1    | 0,0230238 |
| AC008746.12   | 0,00178025 | SCN3B         | 0,0037719 |
| SHC1          | 0,03541094 | DRD1          | 6,593E-05 |
| TANGO2        | 0,00398742 | DONSON        | 0,0038343 |
| GAREM2        | 0,02911544 | ZFP92         | 0,0105969 |
| OGDH          | 0,03975477 | OTUD1         | 0,0490291 |
| LINC00323     | 0,0099152  | CCDC183       | 0,0452942 |
| PLIN2         | 0,03348568 | TMEM130       | 0,0251422 |
| DENND1A       | 0,00499807 | RP4-671G15.2  | 0,025903  |
| QPRT          | 0,03040443 | ZSCAN18       | 0,0007337 |
| RP11-755F10.3 | 0,00053537 | APOBEC4       | 0,0068268 |
| LDHB          | 0,02642798 | PNKP          | 0,0201186 |
| PLD6          | 0,00106266 | RBFOX3        | 0,0005544 |
| IGFL4         | 0,03035445 | KCNQ5-IT1     | 1,204E-10 |
| ANKRD10-IT1   | 0,02150664 | MID1IP1       | 0,0278295 |
| NDUFC1        | 0,00047834 | SMDT1         | 0,0065647 |
| NBR1          | 0,04066064 | RP11-12J10.3  | 0,0001855 |
| IMMT          | 0,01337537 | AFAP1-AS1     | 0,0229239 |
| NAALADL2      | 0,0432237  | CHID1         | 0,0301763 |
| AURKA         | 0,04247075 | LINC02282     | 0,0002564 |
| TRAF2         | 0,02064115 | SMPD4         | 0,044183  |
| MIR29B1       | 0,00473797 | RP11-223P11.3 | 0,0132162 |
| USP17L2       | 0,04647942 | GRM8          | 0,003066  |



## Lesion specific genes

|               |            |                |           |
|---------------|------------|----------------|-----------|
| TMEM79        | 0,0228914  | RAB30-AS1      | 0,0379814 |
| ABCC2         | 0,00207196 | SEPT5          | 0,0028418 |
| TTC12         | 0,02191206 | DACH1          | 0,0006392 |
| SPATA12       | 0,01436499 | MPP7           | 0,0363682 |
| OLMALINC      | 0,01243494 | SLC2A13        | 0,0186561 |
| TMEM185B      | 0,01599468 | LINC01792      | 0,0075043 |
| KB-1507C5.4   | 0,01431866 | RASL10B        | 0,0323044 |
| TRPM2         | 0,02582118 | DICER1         | 0,0353155 |
| MVD           | 0,04420093 | MAPKAP1        | 0,0112513 |
| IRS2          | 0,04697425 | CYFIP1         | 0,0346741 |
| PITPNM2       | 0,00419855 | UBQLN4         | 0,0137884 |
| MRPL11        | 0,0153946  | BNIP3P25       | 0,0121452 |
| MPDU1         | 0,00701025 | LMLN           | 0,028195  |
| TMEM5         | 0,00560649 | FRRS1L         | 0,0163262 |
| NLGN3         | 0,04076783 | RP11-216L13.19 | 0,0419133 |
| ASAP1-IT2     | 0,02370822 | MARK1          | 0,0025916 |
| RP11-874J12.4 | 0,04491265 | MRGBP          | 8,639E-05 |
| PIP5K1C       | 0,00273696 | PAK6           | 0,0233564 |
| ERGIC3        | 0,0271842  | RBM4           | 0,0009674 |
| C8orf59       | 0,04652931 | MAGI2-AS1      | 0,0048475 |
| TNFRSF25      | 0,04835088 | SCIN           | 0,0049488 |
| ZBTB24        | 0,03080552 | RP11-452L6.1   | 0,0425219 |
| DOCK6         | 0,04594012 | GNG5           | 0,0115247 |
| RP1-223B1.1   | 0,00309248 | SNHG11         | 0,0229338 |
| RWDD2B        | 0,02922317 | LOC155060      | 0,0066202 |
| SLC35G6       | 0,00384295 | UHRF2          | 0,0147101 |
| COL9A1        | 0,03191349 | ZFP69B         | 0,0136141 |
| BPGM          | 0,00469543 | CCDC122        | 0,0427934 |
| HMOX1         | 0,00273288 | GCM2           | 0,024521  |
| SERPINB8      | 0,02454769 | RASGRP2        | 0,0036973 |
| NXN           | 0,00233365 | LOC101928053   | 0,0075982 |
| PPIH          | 0,01153832 | RCOR3          | 0,0087532 |
| FLCN          | 0,00203953 | RP11-61J19.4   | 0,004642  |
| ROMO1         | 0,04214339 | CDH2           | 0,0001197 |
| CA4           | 0,0248403  | KRAS           | 0,0159433 |

### Lesion specific genes

|               |            |               |           |
|---------------|------------|---------------|-----------|
| LOC100507291  | 0,00219309 | TENM2         | 0,0001863 |
| RBM14         | 1,0354E-05 | LOC440040     | 0,0019545 |
| SPTY2D1       | 0,01797824 | CABCOCO1      | 0,0387174 |
| ENTPD1-AS1    | 0,0076638  | POMZP3        | 0,0128167 |
| MEX3A         | 0,03599562 | MGAT5B        | 0,0373108 |
| KRT8P1        | 0,03575818 | TOM1L2        | 0,04235   |
| RN7SL381P     | 0,0020618  | MNDA          | 0,0261797 |
| RP11-701P16.2 | 0,00874787 | RPS19BP1      | 0,0115432 |
| ABHD13        | 0,00097386 | RP11-14N4.1   | 0,0242234 |
| STX18         | 0,0030196  | CPNE2         | 0,0068475 |
| MPRIP-AS1     | 0,02567394 | GUCY1B3       | 0,0012875 |
| NIF3L1        | 0,00682809 | FSTL4         | 6,878E-05 |
| RFC1          | 0,02385831 | TMEM171       | 0,0189405 |
| ANKRD44       | 0,02591422 | PAXIP1        | 0,0120291 |
| LMBR1L        | 0,02337226 | RP11-2E11.9   | 0,0238911 |
| SLC25A20      | 0,00659502 | PDXDC2P       | 0,0245386 |
| RSBN1         | 0,04513898 | RORB          | 9,267E-05 |
| EIF4EBP1      | 0,00981468 | SLC9A7        | 0,0008236 |
| ARSD          | 0,03494307 | VAPB          | 0,0334051 |
| TIMELESS      | 0,01363387 | SNAP25        | 0,0062656 |
| ZNF396        | 0,0061583  | RP11-1140I5.1 | 0,006838  |
| TDRD6         | 0,00729912 | IFT22         | 0,0040883 |
| RP11-158H5.7  | 0,03459823 | RP11-43D2.2   | 0,0219639 |
| P4HA1         | 0,00244775 | FN3KRP        | 0,0157101 |
| GPR17         | 0,0097941  | ITPKA         | 0,01501   |
| COL4A1        | 0,00761638 | GPATCH4       | 0,0102192 |
| OSBPL2        | 0,00349774 | B4GALT6       | 0,0038225 |
| MNT           | 0,00106266 | PCDHB4        | 0,0221886 |
| PURB          | 0,00509031 | ZNF792        | 0,0212443 |
| RP11-714G18.1 | 0,00090631 | TTC39C        | 0,040192  |
| GTF2I         | 0,04065539 | CLVS2         | 2,745E-07 |
| IGSF9B        | 0,0385436  | KCNC3         | 0,0285949 |
| KCNJ2-AS1     | 0,01290298 | USP25         | 0,003152  |
| ABCB6         | 0,00173916 | LOC101927751  | 0,0079499 |
| AC069282.6    | 0,00255992 | AC004593.3    | 0,0066812 |

### Lesion specific genes

|               |            |               |           |
|---------------|------------|---------------|-----------|
| SPATA13-AS1   | 0,03351158 | PARP6         | 0,0050278 |
| AZI2          | 0,00351406 | GAMT          | 0,0071378 |
| NFXL1         | 0,04591011 | PFKFB3        | 0,0246412 |
| KPTN          | 0,01483435 | CLCN7         | 0,0321104 |
| PSMB3         | 0,00639275 | JPH4          | 0,0113562 |
| DEDD2         | 0,00782788 | CABLES2       | 0,0241201 |
| TOLLIP        | 0,02328627 | MAN2A1        | 0,0403635 |
| PLVAP         | 0,01493603 | RP11-509E10.1 | 0,0001058 |
| RP11-138A9.2  | 0,00358025 | CSNK1D        | 0,0183823 |
| RP11-1277A3.1 | 0,03691765 | PTPRT         | 0,0450061 |
| AP000892.4    | 0,00148084 | RALGDS        | 0,0085475 |
| PIPOX         | 0,0080918  | SCARNA6       | 0,0007934 |
| CACNA1G       | 0,03401718 | ARFGAP2       | 0,0098312 |
| VGLL4         | 0,00771007 | PLEKHH2       | 0,0201863 |
| TMEM81        | 0,0050386  | RP11-849F2.5  | 0,007379  |
| UBOX5-AS1     | 0,04649377 | CXXC5         | 0,0317172 |
| PVR           | 1,5258E-06 | LRRTM1        | 6,082E-08 |
| PLOD1         | 1,9623E-05 | VPS13A        | 0,0027398 |
| RYR3          | 0,00489563 | LHPP          | 0,0258802 |
| VAMP2         | 0,02116065 | OSBPL6        | 4,673E-06 |
| MEF2D         | 0,03391706 | RXFP1         | 0,0327231 |
| PANX1         | 0,01895687 | NIPAL2        | 4,756E-06 |
| AP000692.9    | 0,00499024 | CUX2          | 0,025903  |
| TICAM1        | 0,01341255 | MIR421        | 0,0375487 |
| ZBTB34        | 0,0425902  | ZBED8         | 0,0041242 |
| PTRHD1        | 0,01800666 | LCNL1         | 0,0172975 |
| FLVCR1        | 0,00821109 | SKIV2L        | 0,0213701 |
| FAM201A       | 0,02587897 | BMPER         | 0,0492304 |
| LYRM2         | 0,04327469 | C16orf96      | 0,0144607 |
| RP11-493E12.2 | 0,03752112 | ADA           | 0,0278642 |
| PKD2          | 0,02926919 | EPHX2         | 0,0264395 |
| LINC00653     | 0,0258398  | ZMAT3         | 0,0140811 |
| RP11-324I22.4 | 0,02997776 | ATF7IP        | 0,0007596 |
| PTOV1         | 0,01000447 | GPR26         | 0,0287924 |
| PTPN11        | 0,03018657 | LINC01561     | 0,0441352 |

### Lesion specific genes

|               |            |                  |           |
|---------------|------------|------------------|-----------|
| PSMC2         | 0,0067899  | RP11-214K3.22    | 0,0118177 |
| LINC00173     | 0,00500704 | DUOX1            | 0,0004045 |
| RP11-378A13.1 | 0,00449258 | AC004945.1       | 0,036964  |
| PM20D2        | 0,00219485 | SAP30L-AS1       | 0,0312639 |
| C11orf98P1    | 0,04634405 | SSPO             | 0,0004399 |
| USP49         | 0,02195851 | ACYP1            | 0,013379  |
| RP6-109B7.2   | 0,00678644 | ARPC2            | 0,0018389 |
| RN7SL396P     | 0,00631408 | P2RY13           | 8,415E-05 |
| NOP2          | 0,0078953  | OGT              | 0,0247632 |
| SDHAF3        | 0,00830071 | RPL3P6           | 0,020101  |
| LINC02593     | 0,00019403 | CBFB             | 0,0048111 |
| PSPN          | 0,00135954 | EBAG9            | 0,0315977 |
| MTMR8         | 0,00438122 | COMMD4           | 0,0233635 |
| PPIAP22       | 0,00094292 | ZNF276           | 0,0125941 |
| APLNR         | 0,04057964 | RP4-561L24.3     | 0,0166914 |
| MPV17L        | 0,01601282 | ACTL6B           | 0,0369818 |
| NUDT18        | 0,03632991 | STXBP5L          | 0,0010842 |
| PRSS35        | 0,00351406 | NSF              | 0,0184772 |
| RP11-1129I3.1 | 2,2049E-07 | EBF4             | 0,0066522 |
| ZNF410        | 0,00551331 | ANKRD39          | 0,0428317 |
| LINC00963     | 0,0468163  | HTR1F            | 0,0098475 |
| C4orf36       | 0,00182733 | CDCA3            | 0,0477951 |
| HILS1         | 0,00073326 | XXbac-B476C20.14 | 0,0222597 |
| LEPROT        | 0,02351092 | PLCB1            | 4,871E-06 |
| MRRF          | 0,02718977 | MTG2             | 0,0464924 |
| ZYX           | 0,04929127 | LOXL2            | 0,0001037 |
| NCAPG2        | 0,026915   | RASGRP1          | 0,0035909 |
| KCNMB1        | 2,1913E-05 | NDUFAF2          | 0,0239002 |
| ITGAV         | 0,00256012 | GUCY1A2          | 0,0011293 |
| MMACHC        | 0,0204378  | CHST9            | 0,0079631 |
| CTD-2201I18.1 | 0,00568712 | ZBTB33           | 0,0001113 |
| C11orf95      | 0,03808907 | GOLGA8H          | 0,0231275 |
| SRGAP2        | 0,04356124 | MTURN            | 0,0232844 |
| SMN2          | 0,00488221 | MYO19            | 0,0171214 |
| RP11-110G21.1 | 0,00054352 | HTR5A-AS1        | 0,0011952 |

## Lesion specific genes

|              |            |              |           |
|--------------|------------|--------------|-----------|
| NSL1         | 0,00805229 | FGF9         | 0,0049196 |
| AC016831.7   | 0,01179488 | LINC02060    | 0,0013367 |
| P2RY12       | 1,2661E-05 | CACNA1A      | 0,023217  |
| KANSL1       | 0,02498783 | ABI1         | 0,0116239 |
| GCNT7        | 0,02317015 | SLC1A4       | 0,0413247 |
| KIAA2026     | 0,03865489 | RP11-691H4.4 | 0,0062912 |
| TNFAIP8L1    | 0,02041158 | GNAQ         | 0,0351378 |
| GBA          | 0,04332551 | CKAP2        | 8,326E-05 |
| JOSD1        | 0,03352705 | CACNG3       | 0,0025592 |
| UCKL1-AS1    | 0,00029393 | TMEM173      | 0,0214272 |
| CEP89        | 0,00747906 | HNRNPM       | 0,0115432 |
| ZNF761       | 0,04638481 | ZNF14        | 0,0094987 |
| CHAC1        | 2,1913E-05 | CALCRL       | 0,0400168 |
| INTS3        | 0,02743809 | MIR548V      | 0,0012991 |
| ZNF558       | 0,0243418  | RP5-850O15.3 | 0,0116377 |
| FAM227B      | 0,00050422 | MICAL3       | 0,009055  |
| RIN1         | 0,04626585 | PCDH8        | 0,0281654 |
| ZDHHC18      | 0,01002868 | PAICSP4      | 0,0003422 |
| ST3GAL2      | 0,02383081 | NOL6         | 0,0110408 |
| RMI1         | 0,0256513  | STEAP2       | 7,211E-07 |
| CLDN15       | 0,00242308 | TRIM44       | 0,0039235 |
| SOCS7        | 0,0006294  | RYR2         | 0,0035743 |
| RP1-168P16.3 | 0,02349519 | SERHL2       | 0,025264  |
| MYH15        | 0,00223206 | LINC01422    | 0,0025717 |
| LINC01141    | 0,00088996 | PCSK6-AS1    | 0,0402594 |
| ATP1A2       | 0,02446563 | FAT3         | 0,0001151 |
| GRASP        | 0,00473797 | ZNF273       | 0,000508  |
| AC005519.4   | 0,00146876 | RP11-529F4.1 | 0,006714  |
| EPN3         | 0,00757313 | WSCD2        | 0,0012103 |
| JMJD6        | 1,2734E-11 | GABRA4       | 0,00012   |
| ARRDC3       | 0,01804637 | MACROD2-AS1  | 0,0125173 |
| DDIT3        | 0,03651087 | OPRM1        | 0,0197143 |
| HPCAL1       | 0,00168255 | AC159540.1   | 0,0247496 |
| RP5-894A10.2 | 0,00108043 | GNB5         | 0,010208  |
| IFIT1        | 0,01740832 | RSAD2        | 0,0129385 |

### Lesion specific genes

|               |            |               |           |
|---------------|------------|---------------|-----------|
| HSPA5         | 0,0140185  | CRTC3         | 0,0208341 |
| SYS1          | 0,04166604 | CDH23         | 0,0070307 |
| ZNF449        | 0,04186976 | EXOG          | 0,0197485 |
| MGME1         | 0,00282379 | RGS6          | 0,0199898 |
| PFDN6         | 0,01329944 | RNF144A-AS1   | 0,0015688 |
| ANAPC16       | 0,02182246 | RNF121        | 0,0296473 |
| RN7SL566P     | 0,01641771 | MEG3          | 0,0001515 |
| LOC105375666  | 0,03949352 | DYRK1A        | 0,0002973 |
| RP11-754B17.1 | 0,01447259 | HTRA2         | 0,0401677 |
| RP11-16P6.1   | 2,0913E-05 | TMEM30A       | 0,0312884 |
| PRR34-AS1     | 0,01772196 | ETV5          | 0,0001654 |
| EID3          | 0,02444528 | PIP           | 0,0043149 |
| RP11-301L8.2  | 0,01511509 | GSTO1         | 0,0001674 |
| FGFR1OP       | 0,00298318 | CORO7         | 0,0274522 |
| SNHG10        | 0,04051835 | MAD2L1BP      | 0,0106006 |
| RP11-367H1.1  | 0,00660471 | PCP4          | 0,000962  |
| HSF1          | 0,00460658 | CDC42BPB      | 0,0136496 |
| ADSL          | 0,01483404 | RIMS2         | 0,0065748 |
| POLR3H        | 0,03003876 | RP11-556G22.1 | 0,0019661 |
| ABHD11        | 0,03916725 | NPTN          | 0,0001402 |
| CTD-3131K8.2  | 0,03207214 | UPP1          | 0,0090334 |
| LINC01003     | 2,3282E-05 | SCN8A         | 0,0011066 |
| NMI           | 0,02619584 | RNF149        | 0,0194168 |
| RNASEH2A      | 0,00908016 | FDXR          | 0,0168253 |
| REL           | 0,03745657 | PRKAB1        | 0,0256878 |
| PEX10         | 0,0168502  | LINC01748     | 0,0420266 |
| CTC-360G5.9   | 0,01734135 | KSR2          | 0,0157852 |
| ALS2CL        | 0,01086871 | L3MBTL3       | 0,0488315 |
| SCAND2P       | 0,01561799 | SNRPB         | 0,0355517 |
| C6orf106      | 0,00174179 | DLGAP2        | 0,0005876 |
| HSP90AB3P     | 3,3914E-06 | TAPT1         | 0,0187228 |
| PEX11A        | 0,02490853 | SS18L1        | 0,0379697 |
| LOC102724017  | 0,04065539 | COL10A1       | 0,0250509 |
| TRAM2-AS1     | 0,00437579 | NAA25         | 0,0043015 |
| LRP4          | 0,02454999 | ELL2          | 0,0440985 |

### Lesion specific genes

|              |            |              |           |
|--------------|------------|--------------|-----------|
| ABLM3        | 0,0116566  | LOC105370941 | 0,0279965 |
| Z69666.2     | 0,03470531 | RANP4        | 0,000639  |
| PKMP3        | 0,0011146  | GPR87        | 0,0063283 |
| GTF2IP14     | 0,0094216  | RIPOR2       | 0,0301725 |
| KLF10        | 0,02344108 | ADPRHL2      | 0,011486  |
| HGSNAT       | 0,00540098 | RPF1         | 0,0403359 |
| ATIC         | 0,01954108 | CEP44        | 0,0380649 |
| STRN         | 0,0293601  | PRR26        | 0,0063335 |
| SULT1B1      | 0,00115171 | MGEA5        | 0,0081592 |
| NCOA4        | 0,04772128 | LRCH3        | 0,0405366 |
| POC1B        | 0,02605876 | LIG3         | 0,0415452 |
| SERTAD4-AS1  | 0,0322673  | ECI1         | 0,0219344 |
| RPL9P29      | 0,01095178 | SLC4A11      | 0,0064647 |
| SLC25A5-AS1  | 0,01073076 | MYH7B        | 0,0067206 |
| ATP5G1       | 0,02801721 | UNC45A       | 0,0180222 |
| PPWD1        | 0,04022588 | GIT2         | 0,0216292 |
| PTCH2        | 0,04814379 | SDCCAG3      | 0,0152282 |
| GOLGA8B      | 0,00226738 | LRRC3B       | 0,0255775 |
| RP11-799D4.4 | 0,00064763 | FANCB        | 0,0328568 |
|              |            | LMBR1        | 0,0338172 |
|              |            | RPL5P14      | 0,0181529 |
|              |            | TMCC1-AS1    | 0,0039339 |
|              |            | PPP1R12A-AS1 | 0,0136631 |
|              |            | FLRT1        | 0,0106015 |
|              |            | SNX17        | 0,0069624 |
|              |            | SPOCD1       | 0,0094816 |
|              |            | CDHR2        | 0,0442045 |
|              |            | ELOA-AS1     | 0,0030934 |
|              |            | HBA1         | 0,023408  |
|              |            | MPST         | 0,0173514 |
|              |            | LOC554206    | 0,0268247 |
|              |            | STOX1        | 0,0008292 |
|              |            | NAP1L2       | 0,0251273 |
|              |            | EPB41L4B     | 0,0008206 |
|              |            | XK           | 0,032714  |

## Lesion specific genes

|               |           |
|---------------|-----------|
| IGLV5-52      | 0,0437158 |
| PHYHIP        | 0,021307  |
| SLC12A8       | 0,0159821 |
| LRRN1         | 7,335E-06 |
| IGSF3         | 0,0018543 |
| DUS2          | 0,017197  |
| PTCD3         | 0,0220641 |
| TEAD1         | 0,0268459 |
| MAPKAPK2      | 0,0406814 |
| DIP2A         | 0,0015271 |
| PRKCB         | 3,236E-05 |
| RELT          | 0,0202013 |
| ROCK2         | 0,0121805 |
| PPP1R15B      | 0,0399573 |
| SMG1P6        | 0,000342  |
| HES1          | 0,0192525 |
| LINC01138     | 0,0173514 |
| RBM17         | 0,0178357 |
| SUPT4H1       | 0,0167259 |
| ARHGEF26-AS1  | 0,0143035 |
| ANO5          | 0,0300775 |
| RP11-378J18.8 | 0,0314343 |
| DNAJC15       | 0,0195215 |
| EXOC3         | 0,0087208 |
| SMUG1         | 0,0250357 |
| AP3M2         | 0,0136794 |
| ZNF385B       | 5,475E-07 |
| ETNK2         | 0,0097551 |
| KLF3-AS1      | 3,48E-05  |
| ING5          | 0,0029675 |
| KIAA1211L     | 0,0005927 |
| AP006222.2    | 3,106E-06 |
| OPHN1         | 0,0292817 |
| MARF1         | 0,0285477 |
| MYO15B        | 0,0171373 |



## Lesion specific genes

|              |           |
|--------------|-----------|
| KIAA1324     | 0,0216948 |
| PLCL2        | 6,831E-05 |
| WDFY2        | 0,003366  |
| RP5-940J5.6  | 0,0381636 |
| TIMM22       | 0,0172936 |
| TOMM34       | 2,98E-05  |
| CHST11       | 0,0259889 |
| POLR2J4      | 0,0085784 |
| HMGB1P21     | 0,0295374 |
| B3GALT5      | 0,0164342 |
| TSPAN7       | 0,0077999 |
| MAPK10       | 0,0014232 |
| TM6SF1       | 0,0213701 |
| COX10        | 0,0015688 |
| DNAJA3       | 0,0306941 |
| FAM234A      | 0,0419128 |
| KCNQ5        | 3,487E-05 |
| KRT222       | 0,0187003 |
| TPBG         | 5,241E-06 |
| CDHR5        | 0,0205829 |
| TATDN2P2     | 0,0286929 |
| LONRF2       | 0,0156021 |
| NRG4         | 0,0267338 |
| PIGF         | 0,0357867 |
| ATP6V1C1     | 0,0079053 |
| KCNA4        | 0,0028163 |
| COQ10B       | 0,0293637 |
| NMNAT2       | 0,0003327 |
| SH3PXD2A     | 0,0002191 |
| MILR1        | 0,0099642 |
| MICALL1      | 0,0003029 |
| LOC101927972 | 0,0005787 |
| MTCO2P12     | 0,0360118 |
| KCNJ6        | 0,0030266 |
| STRIP1       | 0,0163782 |

## Lesion specific genes

|               |           |
|---------------|-----------|
| UPP2          | 0,0311778 |
| DOK4          | 0,0492534 |
| GPR158        | 0,0011053 |
| KCNIP4-IT1    | 0,0001412 |
| SLC4A5        | 0,0009177 |
| CELF5         | 0,0328148 |
| GRIP1         | 0,0142465 |
| CYP2T1P       | 0,0003739 |
| JPH2          | 0,0241212 |
| ATP2B2        | 0,0012146 |
| RGS20         | 0,0158192 |
| RP11-550F7.1  | 0,0087478 |
| SLC51B        | 0,0489878 |
| RP11-171G2.1  | 0,0195555 |
| RER1          | 0,0034386 |
| ELAVL2        | 0,0480129 |
| CSMD3         | 0,0061967 |
| DLGAP1        | 0,0031472 |
| DLGAP1-AS4    | 0,0001313 |
| LAMTOR3       | 0,0487609 |
| GTF2H5        | 0,0319639 |
| ISCU          | 0,0492373 |
| FAM131C       | 0,0004682 |
| ANKRD20A5P    | 5,289E-05 |
| VAX1          | 0,0095779 |
| DOPEY2        | 0,0205749 |
| RP11-798M19.6 | 0,021587  |
| RP11-211A18.2 | 0,0021793 |
| RP11-35G9.5   | 0,0175443 |
| SAT2          | 0,0255259 |
| RMDN3         | 0,0457551 |
| ACTBP7        | 0,0002447 |
| KIAA0753      | 0,0002726 |
| CLIP2         | 0,0298093 |
| PPCDC         | 0,0260288 |

## Lesion specific genes

|               |           |
|---------------|-----------|
| NT5E          | 0,0072352 |
| RP11-438B23.2 | 0,0289139 |
| IL18          | 0,0474957 |
| VPS16         | 0,0027082 |
| FOXRED1       | 0,0370315 |
| CEP164        | 0,0338113 |
| TUSC7         | 0,0073677 |
| CCDC144A      | 0,0023242 |
| WIF1          | 9,366E-06 |
| TMOD2         | 0,0030098 |
| SLC44A5       | 0,0420366 |
| FAM153C       | 0,0126896 |
| FBXL5         | 0,0282032 |
| METTL16       | 0,0276382 |
| KAT5          | 0,0285949 |
| CSRNP1        | 0,045094  |
| NRSN1         | 4,317E-05 |
| GRIN2A        | 0,0089687 |
| MAN2C1        | 0,0034491 |
| CEP72         | 0,0219639 |
| SNRNP48       | 0,0058166 |
| NRXN1         | 0,0106352 |
| AGBL1         | 0,0069155 |
| NELL2         | 0,0150977 |
| ARHGAP10      | 0,0309688 |
| DPY19L2P2     | 0,0004767 |
| VCP           | 0,0005055 |
| THEMIS2       | 0,0018787 |
| GSK3B         | 0,0496491 |
| GPD1L         | 0,0016781 |
| KLHDC2        | 0,0410057 |
| RP11-293M10.6 | 1,431E-06 |
| PKP2          | 8,822E-07 |
| TMEM205       | 0,0132989 |
| USP51         | 0,0385905 |

## Lesion specific genes

|               |           |
|---------------|-----------|
| UPF1          | 0,0315027 |
| CTDP1         | 0,0242104 |
| ACOX3         | 0,0229239 |
| INHCAP        | 0,0003037 |
| UBE2QL1       | 0,0067551 |
| RP5-1039K5.16 | 0,0001908 |
| TRPV1         | 1,377E-07 |
| CC2D1B        | 0,0425075 |
| PLXNA4        | 0,003197  |
| SYN2          | 0,0060205 |
| URB2          | 0,0479182 |
| AC006160.5    | 0,0014217 |
| EIF2AK2       | 0,0038075 |
| LMO7          | 0,0011919 |
| CITED2        | 0,0075901 |
| VSTM2A-OT1    | 0,0413839 |
| GRAMD1B       | 0,0026917 |
| FOXP2         | 7,216E-05 |
| ASH1L-AS1     | 0,0014835 |
| ATP5J2        | 0,0193999 |
| BRCA2         | 0,037727  |
| TUNAR         | 0,0004468 |
| SCAMP4        | 0,0154846 |
| MIER2         | 0,0328992 |
| FAM171B       | 0,0213803 |
| TFB1M         | 0,0150166 |
| MOV10L1       | 0,0470797 |
| NAGLU         | 0,0095705 |
| SERTAD4       | 0,0096765 |
| CDON          | 0,0312309 |
| SH3YL1        | 0,0148888 |
| NDST3         | 0,0016421 |
| FAM19A2       | 0,0189198 |
| CAPN2         | 0,0247319 |
| TRIM17        | 0,0219437 |

## Lesion specific genes

|               |           |
|---------------|-----------|
| ZSCAN21       | 0,0101273 |
| PRC1          | 0,0285205 |
| RP11-449P15.2 | 0,0439064 |
| MYT1L         | 0,0050899 |
| OSBPL7        | 0,0367409 |
| UFD1          | 0,0188177 |
| ARMC9         | 0,0023152 |
| SLITRK3       | 0,0232448 |
| ITPKB         | 0,0078801 |
| ZBED9         | 0,0017847 |
| TTC39B        | 0,0090167 |
| RP11-342M3.5  | 0,0139147 |
| IPCEF1        | 0,0164493 |
| C2orf72       | 0,0032841 |
| BIN2          | 0,0035252 |
| D2HGDH        | 0,0287864 |
| C2orf80       | 0,0036881 |
| TOM1L1        | 0,0224585 |
| LINC00869     | 0,0083318 |
| RP11-290D2.3  | 0,0014326 |
| CKMT1A        | 0,0273767 |
| EIF4ENIF1     | 0,0184747 |
| RPL7L1P12     | 0,0113342 |
| TAZ           | 0,0009946 |
| WASH5P        | 0,016019  |
| DIO2          | 0,0057857 |
| CRYZP1        | 0,038001  |
| TAF11         | 0,0002306 |
| UNC13A        | 0,0035278 |
| TARBP2        | 0,0236757 |
| TUBGCP4       | 0,008263  |
| PLS3-AS1      | 0,0261195 |
| NCOA1         | 0,0046752 |
| GCN1          | 0,0054289 |
| HIPK4         | 0,0464426 |

## Lesion specific genes

|              |           |
|--------------|-----------|
| SYF2         | 0,0338374 |
| CEP192       | 0,0036493 |
| HHLA3        | 0,0124362 |
| FAM66C       | 0,0229197 |
| ZNF688       | 0,0384428 |
| CACNB2       | 1,785E-06 |
| PDE10A       | 0,0028209 |
| UBE2V1P1     | 0,0329378 |
| METTL24      | 0,0076929 |
| RHOJ         | 0,00305   |
| VSTM2A       | 0,0008062 |
| INTS2        | 0,0290508 |
| CCZ1         | 0,0017879 |
| SYBU         | 0,0299666 |
| PDE4DIP      | 0,0158609 |
| MCF2         | 0,0356108 |
| ZNF263       | 0,0113599 |
| MED12L       | 9,987E-06 |
| FBXL16       | 0,0275149 |
| RP11-263K4.1 | 0,0094538 |
| SHPK         | 0,0027552 |
| RNH1         | 0,0017263 |
| CDH7         | 8,924E-05 |
| FGF12-AS1    | 0,0004525 |
| SHANK2       | 0,0038225 |
| FGF13        | 0,0022375 |
| CASKIN2      | 0,0410952 |
| TAB3         | 0,0346991 |
| ZNF252P-AS1  | 0,0489898 |
| ZNF496       | 0,038963  |
| MAGEE2       | 6,153E-06 |
| RNF10        | 0,0013992 |
| ZNF567       | 0,0041421 |
| NCBP3        | 0,0297402 |
| RP1-97G4.1   | 0,0002593 |

## Lesion specific genes

|                |           |
|----------------|-----------|
| NREP           | 0,0001396 |
| SUMO2P8        | 0,0001915 |
| RP11-327O17.2  | 0,0076218 |
| GABRA5         | 0,0069812 |
| CELSR2         | 0,0475612 |
| TLK2P1         | 0,0153116 |
| CIAPIN1        | 0,0472419 |
| NANOGP4        | 0,0172058 |
| HILPDA         | 0,0237517 |
| HOOK1          | 0,0008639 |
| NEXMIF         | 0,001428  |
| KCNQ3          | 0,0150367 |
| SOCS5          | 0,02042   |
| DLG5           | 0,0162204 |
| TFEB           | 0,0072484 |
| AF131215.9     | 0,0058906 |
| PROX2          | 0,0022192 |
| RPAP2          | 0,0471365 |
| MIA3           | 0,0111227 |
| RP11-1023L17.2 | 3,918E-05 |
| HARS2          | 0,0011257 |
| UBE2V1         | 0,0049201 |
| RP11-999E24.3  | 0,0044402 |
| CNNM3          | 0,0150988 |
| TSTD2          | 0,0181679 |
| ANO3           | 0,000667  |
| SFT2D2         | 0,0384321 |
| JMJD7-PLA2G4B  | 0,0238453 |
| IFRD2          | 0,0095812 |
| PYCR2          | 0,0432484 |
| ZNF391         | 0,0003222 |
| FAM20C         | 0,009959  |
| WRB            | 0,0423372 |
| NDUFS3         | 0,0218591 |
| SAMD4B         | 0,0064355 |

## Lesion specific genes

|              |           |
|--------------|-----------|
| MAP2K3       | 0,0122262 |
| SMAP2        | 0,0135203 |
| RFC5         | 0,001565  |
| BRAF         | 0,0204944 |
| BABAM2       | 0,0176987 |
| HHATL-AS1    | 0,038788  |
| PASK         | 0,0005792 |
| ZNF776       | 0,0104275 |
| ARFGAP1      | 0,0106967 |
| CTD-2248H3.1 | 0,0340075 |
| COL12A1      | 0,0107921 |
| CHST3        | 0,014234  |
| TRIM62       | 0,000272  |
| RP11-823P9.3 | 0,0167067 |
| MAP3K9       | 0,0222597 |
| NYAP2        | 0,0026021 |
| NCR3LG1      | 0,0017329 |
| C15orf61     | 7,885E-05 |
| HECW1        | 0,0033227 |
| HECW1-IT1    | 1,127E-05 |
| ZNF519       | 0,0029446 |
| ZNF304       | 0,0446428 |
| DBNL         | 0,0312884 |
| KANK1        | 0,0410057 |
| ZNRF2P2      | 0,0134305 |
| RNF122       | 0,0296413 |
| CXCL14       | 6,763E-05 |
| C17orf76-AS1 | 0,0380269 |
| AC013394.2   | 0,018141  |
| TPD52L2      | 0,0327231 |
| PTK2B        | 0,0118933 |
| NUDT10       | 0,0049504 |
| FBXW8        | 0,0235035 |
| DUSP22       | 0,0011439 |
| CALB1        | 0,0042899 |



## Lesion specific genes

|               |           |
|---------------|-----------|
| L3MBTL2       | 0,0002593 |
| MCRS1         | 0,0251942 |
| ST6GALNAC5    | 5,887E-05 |
| DIRC2         | 0,021587  |
| GPR83         | 0,0153497 |
| TCIM          | 0,0226981 |
| DIAPH2        | 5,689E-06 |
| LAMP1         | 0,0036483 |
| ARPP21        | 7,277E-05 |
| RGS3          | 0,0239549 |
| UAP1L1        | 0,0011831 |
| SCOC          | 0,0042957 |
| HAGHL         | 0,0153133 |
| ATP11A        | 0,0153646 |
| SLC15A4       | 0,000206  |
| ALDH4A1       | 0,0225186 |
| SPRYD4        | 0,0388597 |
| TRNAU1AP      | 5,005E-05 |
| RASD2         | 1,622E-05 |
| JAKMIP2       | 0,0477535 |
| C6orf203      | 0,0468161 |
| PRKG2         | 0,0185449 |
| CTD-2555O16.2 | 0,0321191 |
| CTC-471F3.5   | 0,0093396 |
| ZNF774        | 0,0086831 |
| PCP4L1        | 9,093E-05 |
| PLXNB1        | 0,0022761 |
| RP11-90P13.1  | 0,0399573 |
| KNSTRN        | 0,0002924 |
| RP11-266L9.6  | 0,0409066 |
| SNAP25-AS1    | 0,0170832 |
| PI4K2A        | 0,0155269 |
| LY86          | 0,0384806 |
| RP1-122P22.2  | 0,0036766 |
| NACC2         | 0,0171214 |

## Lesion specific genes

|               |           |
|---------------|-----------|
| EPHA5         | 0,0003871 |
| EMG1          | 0,0291614 |
| PCDHB11       | 0,0183389 |
| DCLRE1B       | 0,006113  |
| TP53INP2      | 0,0364194 |
| AC092338.5    | 0,000877  |
| RP11-567G24.1 | 0,0134595 |
| OLFM1         | 0,0047605 |
| RBM19         | 0,0116315 |
| PITRM1-AS1    | 0,002099  |
| DBF4          | 0,0076123 |
| EFNB3         | 0,0328148 |
| LOC105374516  | 0,0109775 |
| FAM171A1      | 0,0120468 |
| RP4-742J24.2  | 0,036074  |
| PCLO          | 0,0004925 |
| LINC01725     | 0,0249225 |
| ASPH          | 0,0472774 |
| PGBD1         | 0,0094926 |
| SYNGR2        | 0,0369818 |
| CCNL2         | 7,015E-05 |
| FBXW12        | 0,0031299 |
| RP11-627G23.1 | 0,0064012 |
| TSPYL2        | 0,0001615 |
| RP11-441F2.5  | 0,0409634 |
| CHL1          | 0,0030888 |
| PMS2CL        | 0,0017063 |
| NAA20         | 0,0351309 |
| MED11         | 0,0320879 |
| EFNA1         | 0,0049303 |
| SLC1A2        | 0,0029397 |
| SMIM7         | 0,0205829 |
| TMEM35A       | 0,0025009 |
| GABRB2        | 0,0114344 |
| SLIT3         | 0,0229625 |

## Lesion specific genes

|               |           |
|---------------|-----------|
| EGLN1         | 0,0024469 |
| LOC148413     | 0,0082466 |
| GRIN2B        | 0,0049984 |
| PHC2          | 0,0087748 |
| SLC25A29      | 0,0185449 |
| SPHK1         | 0,00994   |
| RP11-146D12.2 | 0,0158932 |
| FAM222A-AS1   | 0,0011952 |
| RP11-214N15.5 | 0,0281674 |
| AC073342.12   | 8,154E-08 |
| PAK3          | 0,0153497 |
| CHCHD1        | 0,0329676 |
| MRC2          | 0,0113342 |
| CDC42         | 0,0238093 |
| SNX2          | 0,0242726 |
| CHRM3-AS2     | 0,0032334 |
| RP11-967K21.1 | 0,0005753 |
| MAP7D2        | 0,0114192 |
| ZNF134        | 0,0108901 |
| ANKRD36BP2    | 0,0026216 |
| CD9           | 0,0405401 |
| USP53         | 0,0021323 |
| CAMK1G        | 0,0004214 |
| DOK6          | 0,0270497 |
| TMEM129       | 0,0188367 |
| QPCT          | 0,010079  |
| SUN2          | 0,011076  |
| CELF3         | 0,0088454 |
| MLLT3         | 0,0279301 |
| IGSF5         | 0,0009843 |
| SHC3          | 0,0225874 |
| SMARCE1P1     | 0,0345235 |
| RP11-272L13.4 | 0,0079499 |
| RP11-206L10.2 | 0,0382937 |
| AC009961.3    | 0,0098374 |

## Lesion specific genes

|               |           |
|---------------|-----------|
| SEH1L         | 0,0413247 |
| AMIGO1        | 0,042948  |
| OSGIN2        | 0,0042091 |
| RP11-385D13.3 | 0,0002598 |
| NEB           | 0,0079917 |
| CXorf38       | 0,0037607 |
| FBXL2         | 0,0439891 |
| IVD           | 0,0050387 |
| LOC286083     | 0,0167067 |
| MVP           | 0,0005232 |
| AC006262.6    | 0,0004205 |
| L1CAM         | 0,0331498 |
| GNL3L         | 0,0343135 |
| CACNA1D       | 0,0115432 |
| PRKAA2        | 0,0218752 |
| RGS5          | 0,0245579 |
| PRKAR2B       | 3,586E-05 |
| SLC8A1-AS1    | 0,0043409 |
| PCDHB7        | 0,0134563 |
| SEMA5B        | 0,0115207 |
| TYW3          | 0,0043409 |
| LURAP1        | 0,004823  |
| DDX28         | 0,0381094 |
| LRRTM4        | 0,0001853 |
| CACNB4        | 0,0026046 |
| LINC00710     | 0,0079883 |
| LINC00674     | 0,0323044 |
| PTGDS         | 0,0113599 |
| INPP4B        | 0,0102555 |
| IFI6          | 0,0218497 |
| RP11-452L6.5  | 0,0003336 |
| HIVEP2        | 0,013379  |
| RP11-713C5.1  | 0,0242707 |
| SNRPA1        | 0,0167701 |
| CERS5         | 0,0484657 |

## Lesion specific genes

|               |           |
|---------------|-----------|
| ANOS1         | 0,0069107 |
| HMGB1P24      | 0,0403941 |
| TBC1D30       | 0,0002234 |
| STIL          | 0,0487798 |
| DHPS          | 0,001587  |
| AC131971.1    | 0,0471007 |
| SLITRK5       | 3,517E-06 |
| RP11-797A18.6 | 0,0249674 |
| MUL1          | 0,0124166 |
| ST20          | 0,0095098 |
| FUT9          | 0,0106614 |
| SLC4A9        | 0,0242831 |
| OGFOD3        | 0,0316849 |
| CYP27A1       | 0,0006773 |
| CAMK2A        | 0,0249584 |
| GRM5          | 0,0033171 |
| RP11-490E15.2 | 0,0047142 |
| RPS12         | 0,0323757 |
| TMEM198B      | 0,0138718 |
| ABCB10        | 0,0151341 |
| OPRD1         | 0,0268644 |
| LGI1          | 0,0025717 |
| CAPRIN2       | 0,0085116 |
| PURG          | 0,0130485 |
| STRBP         | 0,0006764 |
| PSMA7         | 2,267E-05 |
| CNGA4         | 0,0384739 |
| ACAA1         | 0,003399  |
| TM2D2         | 0,0046512 |
| PPM1L         | 0,0412701 |
| SPATA20       | 0,0414357 |
| PSMB5         | 0,000245  |
| ABCB4         | 0,0135203 |
| RP11-544A12.4 | 0,0117815 |
| CTDSP1        | 0,0349574 |

## Lesion specific genes

|               |           |
|---------------|-----------|
| CDK5R1        | 0,0440587 |
| CHD4          | 0,0051507 |
| ACAD10        | 0,004906  |
| ABHD12B       | 0,003197  |
| TSEN34        | 0,0126896 |
| SMIM14        | 0,0499867 |
| RP11-586K2.1  | 0,0085025 |
| SLC41A2       | 0,0016199 |
| KHSRP         | 0,0063501 |
| KCNIP4        | 0,0159847 |
| CAMK1D        | 9,994E-05 |
| KMT2A         | 0,0339497 |
| PKN1          | 0,0447144 |
| SPON2         | 0,0279307 |
| ARL3          | 0,0399573 |
| BPHL          | 0,0003786 |
| ERCC6         | 0,0073664 |
| THOC6         | 0,0214259 |
| LRRN3         | 0,0075981 |
| PTPRO         | 0,0001744 |
| RP11-573D15.9 | 0,0401668 |
| NSMCE3        | 0,0330497 |
| LMO3          | 0,0042957 |
| XKR6          | 0,0003225 |
| RP11-490G2.2  | 0,0027485 |
| MLH3          | 0,0015116 |
| SRSF9         | 0,0232894 |
| TMOD1         | 0,0002938 |
| INSR          | 0,0167153 |
| PHF13         | 3,918E-05 |
| RP11-856M7.2  | 0,0225577 |
| AC007787.2    | 0,0175597 |
| RASAL2        | 0,0002173 |
| SYNJ1         | 0,0129967 |
| NIT2          | 0,0369384 |

## Lesion specific genes

|               |           |
|---------------|-----------|
| ME3           | 0,0033794 |
| JAK1          | 0,0150977 |
| GPD2          | 0,0270855 |
| RP11-346C16.1 | 0,0025592 |
| MYCBP         | 0,0151023 |
| QSER1         | 0,0011847 |
| NRCAM         | 0,005392  |
| AF131215.2    | 0,0258067 |
| LYRM4         | 0,0021214 |
| TIMM13        | 0,0284385 |
| HSD17B12      | 0,0201288 |
| EFNA3         | 0,042948  |
| TBC1D2        | 0,0031483 |
| HS6ST3        | 0,0194732 |
| EIF3K         | 0,0305948 |
| LINC01551     | 0,0009003 |
| PLB1          | 0,0020373 |
| RP11-680F8.3  | 0,0001323 |
| ENC1          | 0,0408838 |
| HPS5          | 0,0004933 |
| SLFN5         | 0,0282365 |
| ANKRD34A      | 0,0012816 |
| MIOS          | 0,0488652 |
| SV2C          | 0,0085503 |
| GMDS          | 7,906E-05 |
| SPARC         | 0,0073957 |
| RP11-90L20.2  | 0,0125427 |
| ZNF662        | 0,0484226 |
| F3            | 0,0455842 |
| SEPHS2        | 0,0043896 |
| PRICKLE1      | 0,0014217 |
| FOXO3         | 0,0202013 |
| ZBTB5         | 0,0089377 |
| BRD3OS        | 0,0238768 |
| KRT18P57      | 0,0040418 |

## Lesion specific genes

|               |           |
|---------------|-----------|
| CARMIL2       | 0,0438546 |
| DLX1          | 0,0014723 |
| RFX7          | 0,0477769 |
| TESC          | 0,0089704 |
| AC138035.2    | 0,0107208 |
| EOGT          | 0,0117148 |
| STK38         | 0,0228459 |
| AC073343.1    | 0,0308205 |
| TOMM7         | 0,0157698 |
| EVA1C         | 0,0156241 |
| SNHG14        | 0,0398343 |
| PLXDC1        | 0,0012344 |
| RUNDC3A       | 0,0201288 |
| TRHDE-AS1     | 0,0005316 |
| AC007386.4    | 0,0023161 |
| SNAP91        | 0,0056061 |
| RP11-115H15.1 | 0,010079  |
| DAPK1         | 5,289E-05 |
| EEF1A1P5      | 0,0126557 |
| INPP5A        | 0,0104334 |
| B3GAT3        | 0,0258177 |
| RN7SL2        | 0,0137371 |
| MBOAT2        | 0,0030387 |
| KB-318B8.7    | 0,0100642 |
| UBE2Q2P1      | 0,0054117 |
| TOB1          | 0,0389923 |
| RP11-701H24.3 | 0,0043828 |
| SLC16A10      | 0,0016996 |
| RP1-22N22.1   | 0,0312884 |
| LINC01252     | 0,0364194 |
| KCTD1         | 9,083E-05 |
| AC012066.1    | 0,0018346 |
| PMPCA         | 0,0402407 |
| RNF38         | 0,0001187 |
| GLTP          | 0,0320172 |



## Lesion specific genes

|              |           |
|--------------|-----------|
| TMEM151A     | 0,0197608 |
| ARF1P2       | 0,003152  |
| PAK1         | 0,0177294 |
| AHSA2        | 0,0212274 |
| CCDC177      | 0,0264476 |
| FRAS1        | 0,0138891 |
| DCAF5        | 0,0150743 |
| ATP9B        | 0,009548  |
| DAZAP1       | 0,0086752 |
| CTA-204B4.2  | 0,0435624 |
| SRP72P2      | 0,0030733 |
| GYS1         | 0,0117148 |
| RP11-631M6.2 | 0,0248097 |
| TRIM33       | 0,0400049 |
| HCN1         | 0,0025463 |
| ABALON       | 0,0077615 |
| RPS5         | 0,042286  |
| HMGN1        | 0,0042327 |
| ELOVL5       | 0,0301453 |
| LRFN5        | 0,0011411 |
| ENTPD3       | 0,0496326 |
| RP11-364L4.1 | 0,0055659 |
| KCNA1        | 0,0001673 |
| PPP3CA       | 0,0002173 |
| OXLD1        | 0,0081201 |
| DDB2         | 0,0053363 |
| SLC27A3      | 0,0447273 |
| PLEKHO1      | 0,0287288 |
| GAPDHP55     | 0,001562  |
| TRUB2        | 0,0210082 |
| RP11-89N17.4 | 0,0391722 |
| MSH6         | 0,0259114 |
| LINC01410    | 0,0014723 |
| RBFOX1       | 2,648E-05 |
| PCDH7        | 0,0050946 |

## Lesion specific genes

|               |           |
|---------------|-----------|
| ABHD2         | 0,0247496 |
| CDS1          | 4,103E-05 |
| RHEB          | 0,0312239 |
| WDR19         | 0,0469416 |
| GUCA1B        | 0,0229338 |
| RAD18         | 0,0096765 |
| AC079117.1    | 0,0256303 |
| CCDC181       | 0,0007553 |
| KIAA0355      | 0,0228614 |
| ABI2          | 0,0225011 |
| PCDHGA1       | 0,0391305 |
| POLDIP3       | 0,0086831 |
| AF131216.5    | 0,0403635 |
| TP73-AS1      | 0,0267183 |
| HPS4          | 0,0015271 |
| RP11-274B21.1 | 0,0083194 |
| GDNF-AS1      | 0,0296473 |
| FGF14-AS1     | 0,0022058 |
| RP5-1119A7.17 | 0,0002266 |
| HLF           | 0,0001332 |
| TLE2          | 0,0041298 |
| GPRC5C        | 0,0216069 |
| AHCYL1        | 0,0241895 |
| AC010976.2    | 0,0005261 |
| PBX1          | 0,0096463 |
| PLEKHM1P      | 0,0367646 |
| RP1-168L15.5  | 0,0177321 |
| IQSEC2        | 0,0391305 |
| NT5C3B        | 0,0304668 |
| DUBR          | 0,0311339 |
| SCN1A         | 0,0002771 |
| ASAP2         | 0,0225021 |
| SCN3A         | 0,0051134 |
| DEF8          | 0,0373131 |
| ZFPM2         | 0,0093287 |

## Lesion specific genes

|               |           |
|---------------|-----------|
| SLC35F1       | 0,0034915 |
| RP11-473C19.1 | 9,366E-06 |
| C21orf49      | 0,0272948 |
| COG4          | 0,0031026 |
| ASAP1         | 0,016019  |
| HNRNPA0       | 0,0073644 |
| ZNF354C       | 0,0224056 |
| IKBKG         | 0,0018072 |
| FRMPD4        | 0,0223312 |
| GALNT17       | 0,0093296 |
| AMMECR1       | 0,0133352 |
| WDR91         | 0,0466718 |
| HAGH          | 0,0071292 |
| FBLL1         | 0,0293434 |
| AGO2          | 0,0338608 |
| RIMBP2        | 0,0156241 |
| CSPP1         | 0,0253068 |
| THY1          | 0,0063026 |
| KIT           | 0,0016035 |
| TAS2R12       | 0,0079499 |
| EPHA7         | 0,0008757 |
| SCN4B         | 0,001235  |
| SPAG9         | 0,0312309 |
| PEX5L-AS2     | 0,0478029 |
| DGCR5         | 0,0283665 |
| GRIA1         | 0,0004472 |
| WNT5A         | 0,0342803 |
| TMEM176A      | 0,0224938 |
| RNF150        | 3,419E-06 |
| RP11-10N23.2  | 0,0439605 |
| CD200         | 0,0366062 |
| GAD2          | 0,0156737 |
| NPY1R         | 0,0163293 |
| GCNT2         | 0,0102251 |
| GABRG3        | 0,0089704 |

## Lesion specific genes

|              |           |
|--------------|-----------|
| RP11-69E11.4 | 0,0260991 |
| SURF4        | 0,0315977 |
| CTC-524C5.2  | 0,0346991 |
| SGCZ         | 0,0258111 |
| APTX         | 0,0199533 |
| ZNF514       | 0,0264669 |
| ADCK2        | 0,0479502 |
| LRIG1        | 0,0379704 |
| POFUT2       | 0,006908  |
| PCDH11X      | 0,020405  |
| TMC6         | 0,0209455 |
| DRP2         | 0,0011384 |
| ZXDC         | 0,0186035 |
| SLC31A2      | 0,0008681 |
| GPR182       | 0,0072173 |
| CTD-2228K2.7 | 0,0312576 |
| PCDHB13      | 0,0312884 |
| ASB1         | 0,0222399 |
| PCDHA7       | 0,0388293 |
| UCK1         | 0,0341309 |
| RPS10P14     | 0,0280022 |
| PPP1R3F      | 0,0457144 |
| C1orf220     | 0,0221767 |
| RP11-57B24.2 | 0,0314131 |
| ASAH2B       | 0,0172975 |
| RPL23AP64    | 0,0009528 |
| ZDBF2        | 0,0045388 |
| POU2F2       | 0,0195215 |
| AC122129.1   | 0,0177033 |
| HIST2H2AC    | 0,0135203 |
| BEND5        | 0,0372266 |
| EPHB1        | 0,0005479 |
| AC006262.4   | 0,0165907 |
| RECQL5       | 0,0005845 |
| HSD17B7P2    | 0,0018791 |

## Lesion specific genes

|               |           |
|---------------|-----------|
| NR2F2         | 0,0131507 |
| SRRM1         | 0,0493714 |
| MOCS1         | 0,0022055 |
| CACNA2D2      | 0,0193858 |
| ECT2          | 0,0290535 |
| LINC00402     | 0,0098141 |
| GLCC1         | 0,0009871 |
| B3GALT2       | 0,0317306 |
| CCDC167       | 0,0255259 |
| CGREF1        | 0,0100911 |
| BLNK          | 0,0243421 |
| TMEM178B      | 0,0148844 |
| SOGA1         | 0,0370051 |
| KDM5B         | 0,0290496 |
| FAM53B-AS1    | 0,0489478 |
| SLC22A23      | 0,0044416 |
| MAP3K21       | 0,0007711 |
| CTNS          | 0,0008881 |
| GDNF          | 0,0136779 |
| STK36         | 0,0161344 |
| MZT2B         | 0,0251726 |
| GSTM1         | 0,0335378 |
| AMFR          | 0,0063814 |
| LINC02389     | 0,0023875 |
| DKK3          | 0,0392441 |
| MAPK8IP1P2    | 0,0002307 |
| PPP2R5B       | 0,012289  |
| ATG2A         | 0,0353163 |
| RPGRIP1L      | 0,0181679 |
| OSGIN1        | 8,398E-05 |
| PTPRF         | 0,0104741 |
| FXR2          | 0,0111247 |
| RP11-728K20.2 | 0,0346741 |
| SNX9          | 0,0205015 |
| SLC25A17      | 0,0359873 |

## Lesion specific genes

|               |           |
|---------------|-----------|
| TTC39A        | 0,0125411 |
| MCM7          | 0,0037278 |
| HIST1H4D      | 0,0023971 |
| SAMD11        | 0,0025203 |
| MRPL55        | 0,0278666 |
| EML6          | 0,0128167 |
| TTC8          | 0,0212731 |
| TENM3         | 0,0094374 |
| ZNF408        | 0,0192822 |
| TUSC3         | 0,0141619 |
| GABRD         | 0,0075782 |
| LOC101927950  | 0,04953   |
| EVI2B         | 0,004412  |
| PHF2          | 0,0139049 |
| PID1          | 0,0297408 |
| CRIPAK        | 0,0010715 |
| AFDN          | 0,0170943 |
| RALGPS2       | 0,0011596 |
| C2CD2L        | 0,0131359 |
| SNRK          | 0,0051642 |
| DLGAP3        | 0,0187003 |
| IL17RA        | 0,0274118 |
| MPP5          | 0,0348366 |
| CAMK4         | 0,0006009 |
| RP11-739P1.2  | 0,003366  |
| RBFOX2        | 0,0002204 |
| ZNF26         | 0,0036873 |
| DNAJB2        | 0,0354528 |
| KB-1517D11.4  | 0,0105674 |
| RP11-195B17.1 | 0,0004968 |
| PKIA          | 0,0389122 |
| RP11-53B2.4   | 0,0027077 |
| UBE2Z         | 0,0216831 |
| AC103563.8    | 0,0032617 |
| GRM7          | 0,0301725 |

## Lesion specific genes

|                |           |
|----------------|-----------|
| STS            | 0,0006808 |
| RP11-29H23.5   | 7,09E-05  |
| SMIM5          | 0,0135281 |
| RP11-1017G21.5 | 0,0017757 |
| HNRNPCP6       | 0,0019582 |
| RELB           | 0,0124219 |
| PTPRM          | 0,0486378 |
| MARCH4         | 0,0009955 |
| ALG5           | 0,0278588 |
| NCOA2          | 7,919E-06 |
| FAM118B        | 0,0077293 |
| ASPHD2         | 0,0006075 |
| FSBP           | 0,0313315 |
| ZMAT2          | 0,0480217 |
| EIF4H          | 0,0008659 |
| KCNH7          | 5,385E-05 |
| NUAK2          | 0,0019967 |
| MANSC1         | 0,0002195 |
| MIRLET7BHG     | 0,0453398 |
| PMS2P3         | 0,0051547 |
| CDKL5          | 0,0046606 |
| COQ4           | 0,0042491 |
| LY86-AS1       | 0,0270602 |
| ZNF418         | 0,0012774 |
| DDX25          | 0,0433167 |
| CYP51A1P3      | 0,001173  |
| PABPC1P11      | 0,0011283 |
| LOC102546294   | 0,0024328 |
| SCMH1          | 0,0065707 |
| PLPPR4         | 0,0041242 |
| HTR2A          | 0,0072746 |
| R3HDM1         | 0,0003993 |
| APC            | 0,0029989 |
| PEX12          | 0,0304845 |
| MACROD2        | 0,0062901 |

## Lesion specific genes

|               |           |
|---------------|-----------|
| MOCS2         | 0,0008689 |
| RGS7BP        | 4,31E-05  |
| CTB-176F20.3  | 0,0264476 |
| RP11-480A16.1 | 0,034175  |
| CYFIP2        | 0,0014723 |
| TMEM56        | 0,0282656 |
| RCC1L         | 0,0210929 |
| MAP3K11       | 0,0287924 |
| RPS9          | 0,0042037 |
| LRTM2         | 0,0002559 |
| AC009505.2    | 0,0003005 |
| TP53BP2       | 0,0103956 |
| BMP8B         | 0,019096  |
| RP11-421L21.3 | 0,000627  |
| AP000857.2    | 0,003073  |
| PPIP5K1       | 0,0025882 |
| BEAN1         | 0,0410292 |
| L3MBTL1       | 3,396E-05 |
| LOC440084     | 0,0165436 |
| DCHS2         | 0,0014723 |
| SNORD64       | 0,0058906 |
| ALOX12-AS1    | 0,0016243 |
| SENP1         | 0,0140581 |
| UTP4          | 0,0210635 |
| NDUFAF3       | 0,0125569 |
| CDK5RAP2      | 2,044E-06 |
| PABPC1P7      | 0,0011066 |
| TSC22D1-AS1   | 1,579E-05 |
| FASN          | 0,0171791 |
| EPN2-AS1      | 0,0032879 |
| RP11-243J16.7 | 0,0112867 |
| MPPE1         | 0,0003734 |
| SQSTM1        | 0,0099146 |
| ZNF274        | 0,0032528 |
| C7orf26       | 0,0189457 |



## Lesion specific genes

|               |           |
|---------------|-----------|
| ZNF397        | 0,0187767 |
| ANXA13        | 0,0404527 |
| KLHL23        | 0,0099318 |
| CNOT4         | 0,0008382 |
| SLC26A8       | 0,0337263 |
| CTD-3088G3.8  | 0,0001932 |
| SNTG1         | 1,041E-05 |
| KCNA2         | 0,0011119 |
| CDKN1B        | 0,0016237 |
| SEMA3A        | 0,0390894 |
| BTRC          | 0,0441228 |
| TRIM3         | 0,0232558 |
| SLC8A3        | 0,0006892 |
| RP11-63G10.3  | 0,0229757 |
| RP11-416I2.1  | 0,0055932 |
| RNF180        | 0,0451871 |
| NTNG2         | 0,0035217 |
| SRPK3         | 0,033793  |
| REC8          | 0,0040028 |
| NRIP1         | 0,0402594 |
| GPR52         | 0,0096891 |
| MAU2          | 0,004931  |
| RP5-890O3.9   | 0,0079883 |
| CATSPERG      | 0,0022345 |
| AC144530.1    | 0,0093113 |
| PPP2R1B       | 0,0165954 |
| TANC1         | 0,0234135 |
| RP11-175B9.2  | 0,0221098 |
| NCOA7-AS1     | 0,0103551 |
| RP11-192H23.4 | 0,0053578 |
| ANKS6         | 0,0029989 |
| ASB3          | 0,0199898 |
| OGG1          | 0,0046285 |
| LITAF         | 1,395E-06 |
| TUBA1B        | 0,0193812 |

## Lesion specific genes

|               |           |
|---------------|-----------|
| RP11-253I19.3 | 0,0131542 |
| PTP4A2P2      | 0,0213261 |
| BRF1          | 0,0027552 |
| CHCHD7        | 0,00078   |
| RP11-112J3.16 | 0,0373283 |
| KCNB2         | 0,0002598 |
| CUEDC2        | 0,010043  |
| SS18L2        | 0,0102251 |
| GABRB1        | 0,0388678 |
| TAS2R19       | 0,0467353 |
| INF2          | 0,0025717 |
| CRB2          | 0,0055227 |
| LYST          | 0,0322437 |
| ARL10         | 0,016529  |
| RAD51-AS1     | 0,0148589 |
| DLGAP1-AS5    | 5,183E-05 |
| JAKMIP1       | 0,0143726 |
| PRORS1P       | 0,0110306 |
| RIMS3         | 0,0174395 |
| CALR          | 0,026106  |
| CCDC158       | 0,0178372 |
| RP11-216N14.7 | 0,011609  |
| ZRANB1        | 0,0423345 |
| RGS7          | 0,0025353 |
| SGTB          | 0,0224785 |
| C1orf122      | 0,0054918 |
| LINC02024     | 0,0427266 |
| CD2AP         | 0,0346741 |
| MYH10         | 0,0003018 |
| KIF5A         | 0,0045045 |
| ASCC2         | 0,0213447 |
| CYB561D2      | 0,0070092 |
| RSAD1         | 0,005392  |
| LRRC34        | 0,0424368 |
| CDH26         | 0,0003066 |

## Lesion specific genes

|              |           |
|--------------|-----------|
| RP11-71N10.1 | 0,0057108 |
| SCAI         | 0,0121391 |
| NRG2         | 0,049258  |
| RP11-66B24.1 | 0,0169221 |
| SLC12A9      | 0,0317312 |
| TPRN         | 0,0231494 |
| CD46         | 0,0031925 |
| RP11-44D5.1  | 0,0031925 |
| SNORA47      | 0,0372158 |
| ERICH3       | 0,0004297 |
| TRERF1       | 5,945E-06 |
| RP11-798L4.1 | 0,0459208 |
| TINF2        | 0,0019047 |
| BHLHB9       | 0,0153133 |
| NTRK3        | 0,0010336 |
| MIAT         | 0,0199918 |
| POLR3C       | 0,025258  |
| SLC35F3      | 0,0027543 |
| AC006019.4   | 0,009518  |
| RP11-29G8.3  | 0,0153187 |
| CTD-2555K7.2 | 0,0165224 |
| RPS6KB2      | 0,0052929 |
| TXLNA        | 0,0200694 |
| MCEE         | 0,0053933 |
| INTS4P1      | 0,0001088 |
| FREM2        | 0,0138838 |
| DROSHA       | 0,0278295 |
| COASY        | 0,0246412 |
| DOT1L        | 0,016529  |
| AC112229.7   | 3,883E-05 |
| RPRD2        | 0,0031358 |
| MED30        | 0,0155377 |
| CCDC93       | 0,0153646 |
| LMTK2        | 0,0076278 |
| YEATS2-AS1   | 1,983E-05 |

## Lesion specific genes

|              |           |
|--------------|-----------|
| LAMP5        | 4,78E-05  |
| TMSB4Y       | 0,0472068 |
| KATNBL1      | 0,0112657 |
| PHF5A        | 0,0086205 |
| TAGLN        | 0,0413247 |
| C10orf88     | 0,0415    |
| DNAH10OS     | 0,0031533 |
| KCNK2        | 0,0024694 |
| TSPOAP1      | 0,0137369 |
| HNRNPA1P68   | 0,0495418 |
| CNNM1        | 0,0027553 |
| AC012513.4   | 0,0345291 |
| DOCK9        | 0,042948  |
| RRP8         | 0,0256894 |
| RORA         | 0,0012754 |
| CYP4X1       | 0,0022014 |
| TBC1D13      | 0,0202071 |
| EIF1B        | 0,0422958 |
| RP4-534N18.2 | 0,0098904 |
| SPATA25      | 0,0016924 |
| METTL9       | 0,0121994 |
| ANKRD19P     | 0,0002147 |
| WIPF2        | 0,0160851 |
| PLXDC2       | 0,0103032 |
| ELAVL4       | 0,0083534 |
| CDH9         | 0,0008953 |
| ZNF23        | 0,0143313 |
| NAT9         | 0,0023007 |
| CACNG8       | 0,0122618 |
| EIF4A1       | 0,004328  |
| RP1-78O14.1  | 0,0028583 |
| ANKRD30B     | 0,0024116 |
| PCDH19       | 0,0014344 |
| CLINT1       | 0,0092763 |
| LEPROTL1     | 0,0158285 |

## Lesion specific genes

|               |           |
|---------------|-----------|
| AC007740.1    | 0,0003993 |
| NIN           | 0,0199898 |
| HOMER1        | 0,0492304 |
| C11orf87      | 0,0035696 |
| PTGR1         | 0,0344344 |
| FNDC5         | 0,0115776 |
| SERPINB6      | 0,0033237 |
| SCN2A         | 0,0088028 |
| RAB40A        | 0,0229625 |
| CAD           | 0,0113615 |
| AC007246.3    | 0,0402873 |
| RPAIN         | 0,0391896 |
| ARL14EP       | 0,0350008 |
| ST8SIA3       | 0,0025499 |
| NDUFS5P1      | 0,0414482 |
| C19orf48      | 0,033074  |
| PLPP6         | 0,0013712 |
| ALOX12P2      | 0,0038005 |
| CSAD          | 0,0020923 |
| ANKRD50       | 0,0443001 |
| ABAT          | 0,0010264 |
| LHX6          | 0,0178357 |
| RP11-760H22.2 | 0,0461515 |
| IGLON5        | 0,0391365 |
| SRPRB         | 0,0297282 |
| MARC2         | 0,0402712 |
| UBAP2L        | 0,0499254 |
| PRPF18        | 0,015491  |
| SLF2          | 0,0125173 |
| RP11-286E11.2 | 0,0037389 |
| KIF15         | 0,003016  |
| RP11-355F16.1 | 0,0176539 |
| ERP44         | 0,032218  |
| PCDHA3        | 0,0482859 |
| C6orf165      | 0,0331262 |

## Lesion specific genes

|              |           |
|--------------|-----------|
| NSA2         | 0,0008247 |
| KCNH5        | 0,0025952 |
| LOC100128494 | 0,0017518 |
| GPC2         | 0,0342588 |
| MIR124-2HG   | 0,0023642 |
| RP1-67A8.3   | 0,0016472 |
| RGS9         | 0,0181529 |
| RPL23        | 0,0403941 |
| FAM84A       | 0,0001313 |
| CLVS1        | 7,265E-05 |
| STAT2        | 0,0014621 |
| SPART-AS1    | 0,0294777 |
| ROBO2        | 0,0114649 |
| GNA14        | 0,0105272 |
| ALMS1P1      | 0,0153497 |
| OSCP1        | 0,0001341 |
| LLPH         | 0,0281394 |
| CYTH3        | 0,0016024 |
| PLEKHA8      | 0,0033857 |
| C19orf57     | 0,0384535 |
| RP5-821D11.7 | 0,0066936 |
| KIAA2013     | 0,0314306 |
| KIAA0319     | 0,0014588 |
| HDHD5        | 0,0016237 |
| ARHGDI A     | 0,0249588 |
| GCAT         | 0,0082972 |
| TRAPPC4      | 0,0003749 |
| UNC13C       | 0,020914  |
| DNM1P47      | 0,0001371 |
| CAB39L       | 0,0056895 |
| PTPN3        | 0,0028439 |
| ART3         | 0,0021889 |
| FOXP1        | 0,000114  |
| EPHB6        | 0,0022216 |
| CXXC4        | 0,0123194 |

## Lesion specific genes

|                |           |
|----------------|-----------|
| RGMA           | 0,0162176 |
| SSX2IP         | 0,0197688 |
| POMT2          | 0,0097101 |
| CABLES1        | 0,0065751 |
| TUBGCP6        | 0,0333296 |
| MTND4P14       | 0,0015677 |
| BCL11A         | 0,0007806 |
| RP11-1105O14.1 | 3,704E-05 |
| TMEM254        | 0,0008639 |
| VIPR1          | 0,0042605 |
| PTK6           | 0,0001773 |
| DDR1           | 0,002827  |
| ADPGK-AS1      | 0,0053507 |
| C6orf47        | 0,0258633 |
| PSME3          | 0,0326859 |
| NME3           | 0,0029898 |
| RP11-202D18.2  | 0,0040989 |
| CYP46A1        | 0,0013823 |
| CHN1           | 0,0003834 |
| RRNAD1         | 0,0325219 |
| PMM2           | 0,0115953 |
| METTL3         | 0,0186179 |
| ANXA4          | 0,0134643 |
| DCP1B          | 0,0012344 |
| RPS14          | 0,0409222 |
| ONECUT2        | 0,0001036 |
| LGR4           | 0,0256317 |
| UBE2Q1         | 0,0179183 |
| JPH3           | 0,0325219 |
| RP11-73C9.1    | 0,0071407 |
| C20orf204      | 0,0076715 |
| SMARCAL1       | 3,48E-05  |
| SCARNA5        | 4,803E-05 |
| MAT2A          | 0,0150682 |
| SEMA4C         | 0,0023358 |

## Lesion specific genes

|         |           |
|---------|-----------|
| NDRG3   | 0,040884  |
| RNF6    | 0,0102251 |
| CACNA1I | 0,0404237 |
| PHF21A  | 0,0486287 |
| EAF2    | 0,0296413 |
| TRMU    | 0,0035068 |
| OSBPL5  | 0,0012831 |
| EXOC6   | 0,0150079 |
| PIK3IP1 | 0,0284385 |
