# Supplementary material for: Molecular signature of different lesion types in the brain white matter of patients with progressive multiple sclerosis
Source: Acta Neuropathol Commun. 2019 Dec 11;7:205. doi: 10.1186/s40478-019-0855-7 (PMC6907342; doi:10.1186/s40478-019-0855-7)
Supplement: Supplementary file 7 — Additional file 7. Table S4. Pathways of cellular processes in different lesion types based on unique differentially expressed genes. [file 40478_2019_855_MOESM7_ESM.xlsx]

## Sheet: active
			Analysis Type:	PANTHER Overrepresentation Test (Released 20190711)
			Input gene list:	Active lesion specific genes (FDR<0.001)
			Reference List:	Homo sapiens (all genes in database)
			Test Type:	FISHER
			Reactome pathways	number of genes	FDR
			Immune System (R-HSA-168256)	37	3.07E-05
			Innate Immune System (R-HSA-168249)	23	9.81E-04
			Neutrophil degranulation (R-HSA-6798695)	16	2.09E-04
			GO biological process complete	number of genes	FDR
			negative regulation of toll-like receptor 4 signaling pathway (GO:0034144)	3	2.37E-02
			positive regulation of phospholipase C activity (GO:0010863)	5	7.14E-03
			regulation of phospholipase C activity (GO:1900274)	5	8.51E-03
			positive regulation of phospholipase activity (GO:0010518)	6	3.14E-03
			regulation of phospholipase activity (GO:0010517)	6	5.63E-03
			positive regulation of lipase activity (GO:0060193)	6	5.89E-03
			viral entry into host cell (GO:0046718)	7	3.27E-03
			interferon-gamma-mediated signaling pathway (GO:0060333)	5	4.39E-02
			entry into host (GO:0044409)	7	4.48E-03
			entry into host cell (GO:0030260)	7	4.33E-03
			regulation of lipase activity (GO:0060191)	6	1.97E-02
			interaction with host (GO:0051701)	8	6.89E-03
			regulation of wound healing (GO:0061041)	7	1.88E-02
			regulation of response to wounding (GO:1903034)	7	4.55E-02
			neutrophil activation involved in immune response (GO:0002283)	17	1.66E-04
			neutrophil activation (GO:0042119)	17	1.71E-04
			granulocyte activation (GO:0036230)	17	1.60E-04
			neutrophil degranulation (GO:0043312)	16	3.08E-04
			myeloid cell activation involved in immune response (GO:0002275)	17	1.95E-04
			neutrophil mediated immunity (GO:0002446)	16	3.02E-04
			leukocyte degranulation (GO:0043299)	16	3.67E-04
			myeloid leukocyte mediated immunity (GO:0002444)	16	4.45E-04
			myeloid leukocyte activation (GO:0002274)	18	2.10E-04
			negative regulation of response to external stimulus (GO:0032102)	11	1.62E-02
			leukocyte activation involved in immune response (GO:0002366)	18	3.05E-04
			cell activation involved in immune response (GO:0002263)	18	2.87E-04
			leukocyte activation (GO:0045321)	24	1.04E-04
			regulation of cell activation (GO:0050865)	15	1.07E-02
			leukocyte mediated immunity (GO:0002443)	18	2.89E-03
			export from cell (GO:0140352)	24	1.98E-04
			regulated exocytosis (GO:0045055)	16	8.56E-03
			exocytosis (GO:0006887)	18	3.72E-03
			cell activation (GO:0001775)	24	3.14E-04
			immune effector process (GO:0002252)	24	2.90E-04
			secretion by cell (GO:0032940)	22	7.95E-04
			secretion (GO:0046903)	22	3.29E-03
			immune response (GO:0006955)	36	6.33E-05
			defense response (GO:0006952)	25	2.25E-03
			regulation of immune response (GO:0050776)	21	9.86E-03
			response to other organism (GO:0051707)	24	3.63E-03
			response to external biotic stimulus (GO:0043207)	24	3.59E-03
			response to biotic stimulus (GO:0009607)	24	4.38E-03
			positive regulation of immune system process (GO:0002684)	20	2.44E-02
			immune system process (GO:0002376)	44	1.34E-04
			regulation of immune system process (GO:0002682)	26	1.64E-02
			positive regulation of multicellular organismal process (GO:0051240)	27	1.46E-02
			intracellular signal transduction (GO:0035556)	26	1.95E-02
			response to external stimulus (GO:0009605)	36	2.23E-03
			positive regulation of signal transduction (GO:0009967)	25	3.55E-02
			positive regulation of signaling (GO:0023056)	27	3.25E-02
			positive regulation of response to stimulus (GO:0048584)	35	6.57E-03
			response to stress (GO:0006950)	43	1.96E-02
			regulation of response to stimulus (GO:0048583)	50	1.28E-02
			response to chemical (GO:0042221)	51	1.57E-02
			establishment of localization (GO:0051234)	52	1.97E-02
			transport (GO:0006810)	50	3.43E-02
			localization (GO:0051179)	60	2.49E-02
			cellular response to stimulus (GO:0051716)	67	2.38E-02
			response to stimulus (GO:0050896)	85	1.20E-03
			GO cellular component complete	number of genes	FDR
			specific granule (GO:0042581)	7	2.43E-02
			tertiary granule (GO:0070820)	7	2.48E-02
			secretory granule (GO:0030141)	17	1.18E-02
			secretory vesicle (GO:0099503)	20	4.98E-03
			cytoplasmic vesicle (GO:0031410)	35	4.74E-03
			intracellular vesicle (GO:0097708)	35	3.22E-03
			extracellular region part (GO:0044421)	44	6.03E-03
			vesicle (GO:0031982)	47	5.07E-03
			extracellular space (GO:0005615)	41	1.43E-02
			extracellular region (GO:0005576)	53	2.57E-03
			endomembrane system (GO:0012505)	49	4.05E-02
			cytoplasmic part (GO:0044444)	91	5.13E-03
			cytoplasm (GO:0005737)	106	2.58E-03

## Sheet: inative
		Analysis Type:	PANTHER Overrepresentation Test (Released 20190711)
		Input gene list:	Inactive lesion specific genes (FDR<0.001)
		Reference List:	Homo sapiens (all genes in database)
		Test Type:	FISHER
		Reactome pathways		number of genes	FDR
		Attenuation phase (R-HSA-3371568)		7	5.55E-05
		HSF1-dependent transactivation (R-HSA-3371571)		7	3.08E-04
		HSP90 chaperone cycle for steroid hormone receptors (SHR) (R-HSA-3371497)		10	1.09E-04
		Cellular response to heat stress (R-HSA-3371556)		12	1.09E-04
		Regulation of HSF1-mediated heat shock response (R-HSA-3371453)		8	1.54E-02
		Cellular responses to stress (R-HSA-2262752)		25	1.12E-04
		Cellular responses to external stimuli (R-HSA-8953897)		27	1.21E-04
		Metabolism of amino acids and derivatives (R-HSA-71291)		18	3.90E-02
		Neutrophil degranulation (R-HSA-6798695)		22	2.57E-02
		Metabolism (R-HSA-1430728)		75	2.51E-05
		Unclassified (UNCLASSIFIED)		152	2.79E-02
		GO biological process complete		number of genes	FDR
		positive regulation of immune response to tumor cell (GO:0002839)		4	4.50E-02
		positive regulation of response to tumor cell (GO:0002836)		4	4.39E-02
		chaperone-mediated protein complex assembly (GO:0051131)		5	1.97E-02
		chaperone cofactor-dependent protein refolding (GO:0051085)		7	4.05E-03
		protein refolding (GO:0042026)		7	6.64E-03
		'de novo' protein folding (GO:0006458)		8	2.47E-03
		'de novo' posttranslational protein folding (GO:0051084)		7	8.71E-03
		chaperone-mediated protein folding (GO:0061077)		9	2.51E-03
		pigment biosynthetic process (GO:0046148)		7	2.77E-02
		regulation of cellular response to heat (GO:1900034)		11	7.81E-04
		pigment metabolic process (GO:0042440)		8	2.15E-02
		cellular response to heat (GO:0034605)		8	2.93E-02
		response to unfolded protein (GO:0006986)		16	3.03E-04
		alpha-amino acid catabolic process (GO:1901606)		10	2.35E-02
		cellular amino acid catabolic process (GO:0009063)		11	2.02E-02
		response to topologically incorrect protein (GO:0035966)		16	7.92E-04
		protein folding (GO:0006457)		19	2.53E-04
		organic acid catabolic process (GO:0016054)		20	4.44E-04
		carboxylic acid catabolic process (GO:0046395)		20	3.95E-04
		alpha-amino acid metabolic process (GO:1901605)		16	4.54E-03
		cellular amino acid metabolic process (GO:0006520)		21	7.60E-04
		small molecule catabolic process (GO:0044282)		26	3.78E-04
		carboxylic acid biosynthetic process (GO:0046394)		18	1.20E-02
		organic acid biosynthetic process (GO:0016053)		18	1.20E-02
		cofactor metabolic process (GO:0051186)		23	6.10E-03
		oxidation-reduction process (GO:0055114)		49	2.76E-06
		small molecule biosynthetic process (GO:0044283)		28	4.42E-03
		carboxylic acid metabolic process (GO:0019752)		43	6.95E-05
		oxoacid metabolic process (GO:0043436)		47	3.41E-05
		drug metabolic process (GO:0017144)		23	2.76E-02
		organic acid metabolic process (GO:0006082)		47	6.03E-05
		neutrophil degranulation (GO:0043312)		22	4.38E-02
		neutrophil activation involved in immune response (GO:0002283)		22	4.79E-02
		small molecule metabolic process (GO:0044281)		65	1.10E-04
		organonitrogen compound catabolic process (GO:1901565)		38	3.75E-02
		organic substance catabolic process (GO:1901575)		63	5.20E-04
		cell activation (GO:0001775)		38	3.96E-02
		cellular catabolic process (GO:0044248)		62	1.14E-03
		cellular response to stress (GO:0033554)		58	4.16E-03
		catabolic process (GO:0009056)		68	1.41E-03
		metabolic process (GO:0008152)		190	4.56E-02
		cellular process (GO:0009987)		301	1.39E-02
		biological_process (GO:0008150)		350	2.87E-02
		Unclassified (UNCLASSIFIED)		31	2.79E-02
		GO cellular component complete		number of genes	FDR
		COP9 signalosome (GO:0008180)		5	4.38E-02
		ficolin-1-rich granule (GO:0101002)		11	3.95E-03
		ficolin-1-rich granule lumen (GO:1904813)		11	3.72E-03
		lysosomal lumen (GO:0043202)		8	4.12E-02
		vacuolar lumen (GO:0005775)		12	1.04E-02
		secretory granule lumen (GO:0034774)		18	3.73E-03
		cytoplasmic vesicle lumen (GO:0060205)		18	3.99E-03
		vesicle lumen (GO:0031983)		18	4.13E-03
		mitochondrial matrix (GO:0005759)		24	1.87E-03
		focal adhesion (GO:0005925)		18	4.04E-02
		vacuole (GO:0005773)		29	3.68E-02
		extracellular vesicle (GO:1903561)		76	1.21E-05
		extracellular organelle (GO:0043230)		76	9.39E-06
		mitochondrion (GO:0005739)		57	3.53E-04
		mitochondrial part (GO:0044429)		37	1.42E-02
		extracellular exosome (GO:0070062)		73	3.34E-05
		cytoplasmic vesicle part (GO:0044433)		49	9.73E-03
		vesicle (GO:0031982)		113	3.69E-05
		extracellular region part (GO:0044421)		97	3.80E-03
		extracellular space (GO:0005615)		89	1.50E-02
		extracellular region (GO:0005576)		110	1.45E-02
		organelle lumen (GO:0043233)		132	4.00E-03
		intracellular organelle lumen (GO:0070013)		132	3.80E-03
		membrane-enclosed lumen (GO:0031974)		132	3.62E-03
		cytoplasmic part (GO:0044444)		234	2.05E-05
		intracellular organelle part (GO:0044446)		216	5.46E-04
		organelle part (GO:0044422)		220	1.11E-03
		cytoplasm (GO:0005737)		264	2.84E-05
		membrane-bounded organelle (GO:0043227)		281	1.40E-05
		intracellular membrane-bounded organelle (GO:0043231)		241	3.60E-03
		organelle (GO:0043226)		294	1.01E-04
		intracellular organelle (GO:0043229)		274	2.16E-03
		intracellular (GO:0005622)		305	1.32E-03
		intracellular part (GO:0044424)		304	1.92E-03
		cell part (GO:0044464)		340	5.68E-03
		cell (GO:0005623)		340	8.78E-03
		GO molecular function complete		number of genes	FDR
		protein folding chaperone (GO:0044183)		5	4.41E-02
		unfolded protein binding (GO:0051082)		15	1.44E-04
		heat shock protein binding (GO:0031072)		12	4.35E-03
		coenzyme binding (GO:0050662)		18	9.73E-03
		oxidoreductase activity (GO:0016491)		41	7.34E-06
		small molecule binding (GO:0036094)		83	2.33E-04
		anion binding (GO:0043168)		86	1.45E-03
		nucleotide binding (GO:0000166)		66	1.93E-02
		nucleoside phosphate binding (GO:1901265)		66	1.76E-02
		catalytic activity (GO:0003824)		153	2.88E-04
		binding (GO:0005488)		310	2.38E-02
		molecular_function (GO:0003674)		349	1.02E-02
		Unclassified (UNCLASSIFIED)		32	1.15E-02

## Sheet: chronic active
			Analysis Type:	PANTHER Overrepresentation Test (Released 20190711)
			Input gene list:	Chronic active lesion specific genes (FDR<0.001)
			Reference List:	Homo sapiens (all genes in database)
			Test Type:	FISHER
			PANTHER Pathways	number of genes	FDR
			Histamine H1 receptor mediated signaling pathway (P04385)	8	3.86E-02
			Wnt signaling pathway (P00057)	24	2.11E-02
			GO biological process complete	number of genes	FDR
			regulation of postsynaptic cytosolic calcium ion concentration (GO:0099566)	5	2.46E-02
			regulation of collateral sprouting (GO:0048670)	6	3.23E-02
			central nervous system neuron axonogenesis (GO:0021955)	8	1.28E-02
			negative chemotaxis (GO:0050919)	8	3.63E-02
			dendrite morphogenesis (GO:0048813)	10	1.58E-02
			release of sequestered calcium ion into cytosol (GO:0051209)	9	3.21E-02
			regulation of postsynaptic membrane potential (GO:0060078)	16	5.37E-04
			negative regulation of sequestering of calcium ion (GO:0051283)	9	3.72E-02
			positive regulation of synapse assembly (GO:0051965)	10	2.49E-02
			calcium ion transmembrane import into cytosol (GO:0097553)	10	2.89E-02
			calcium ion transport into cytosol (GO:0060402)	10	4.53E-02
			regulation of sequestering of calcium ion (GO:0051282)	16	4.19E-03
			memory (GO:0007613)	15	6.67E-03
			cytosolic calcium ion transport (GO:0060401)	11	4.61E-02
			regulation of synapse assembly (GO:0051963)	13	2.20E-02
			regulation of synapse organization (GO:0050807)	25	2.06E-04
			regulation of synapse structure or activity (GO:0050803)	25	3.28E-04
			cell-cell junction organization (GO:0045216)	15	2.17E-02
			learning (GO:0007612)	16	1.58E-02
			regulation of synaptic plasticity (GO:0048167)	20	3.81E-03
			locomotory behavior (GO:0007626)	21	2.60E-03
			regulation of dendrite development (GO:0050773)	15	4.03E-02
			learning or memory (GO:0007611)	26	8.17E-04
			synapse organization (GO:0050808)	27	6.09E-04
			protein autophosphorylation (GO:0046777)	18	2.51E-02
			glial cell differentiation (GO:0010001)	16	4.59E-02
			modulation of chemical synaptic transmission (GO:0050804)	41	3.10E-05
			axon guidance (GO:0007411)	24	3.95E-03
			regulation of trans-synaptic signaling (GO:0099177)	41	2.96E-05
			cognition (GO:0050890)	28	1.08E-03
			neuron projection guidance (GO:0097485)	24	4.50E-03
			behavior (GO:0007610)	51	5.31E-06
			neuron projection morphogenesis (GO:0048812)	42	8.57E-05
			axon development (GO:0061564)	35	5.45E-04
			axonogenesis (GO:0007409)	32	1.34E-03
			plasma membrane bounded cell projection morphogenesis (GO:0120039)	42	9.20E-05
			cell morphogenesis involved in neuron differentiation (GO:0048667)	37	3.33E-04
			cell projection morphogenesis (GO:0048858)	42	1.01E-04
			cell morphogenesis (GO:0000902)	61	8.84E-07
			trans-synaptic signaling (GO:0099537)	36	6.13E-04
			regulation of membrane potential (GO:0042391)	35	9.53E-04
			cell part morphogenesis (GO:0032990)	42	1.77E-04
			telencephalon development (GO:0021537)	21	4.77E-02
			divalent metal ion transport (GO:0070838)	24	2.45E-02
			synaptic signaling (GO:0099536)	37	7.56E-04
			divalent inorganic cation transport (GO:0072511)	24	2.90E-02
			chemical synaptic transmission (GO:0007268)	32	6.27E-03
			anterograde trans-synaptic signaling (GO:0098916)	32	6.19E-03
			cellular component morphogenesis (GO:0032989)	63	8.70E-06
			regulation of cation transmembrane transport (GO:1904062)	26	3.46E-02
			neuron projection development (GO:0031175)	50	2.08E-04
			cell morphogenesis involved in differentiation (GO:0000904)	41	1.53E-03
			neuron development (GO:0048666)	60	4.19E-05
			regulation of ion transmembrane transport (GO:0034765)	35	7.90E-03
			regulation of neuron projection development (GO:0010975)	36	6.63E-03
			chemotaxis (GO:0006935)	39	4.82E-03
			taxis (GO:0042330)	39	4.96E-03
			regulation of nervous system development (GO:0051960)	66	4.25E-05
			regulation of neurogenesis (GO:0050767)	58	1.66E-04
			divalent inorganic cation homeostasis (GO:0072507)	34	2.04E-02
			regulation of plasma membrane bounded cell projection organization (GO:0120035)	47	1.33E-03
			regulation of neuron differentiation (GO:0045664)	46	1.61E-03
			regulation of cell projection organization (GO:0031344)	47	2.18E-03
			cellular divalent inorganic cation homeostasis (GO:0072503)	32	3.37E-02
			regulation of transmembrane transport (GO:0034762)	38	1.57E-02
			regulation of cell development (GO:0060284)	63	2.48E-04
			positive regulation of protein kinase activity (GO:0045860)	35	3.37E-02
			neuron differentiation (GO:0030182)	66	2.36E-04
			response to wounding (GO:0009611)	37	3.39E-02
			metal ion transport (GO:0030001)	41	2.18E-02
			plasma membrane bounded cell projection organization (GO:0120036)	71	1.99E-04
			positive regulation of kinase activity (GO:0033674)	37	3.62E-02
			regulation of cell differentiation (GO:0045595)	115	1.15E-06
			generation of neurons (GO:0048699)	97	8.46E-06
			cell projection organization (GO:0030030)	72	2.76E-04
			inorganic ion transmembrane transport (GO:0098660)	40	3.40E-02
			neurogenesis (GO:0022008)	102	8.49E-06
			cell development (GO:0048468)	102	7.20E-06
			regulation of ion transport (GO:0043269)	43	2.89E-02
			positive regulation of transferase activity (GO:0051347)	40	4.77E-02
			inorganic ion homeostasis (GO:0098771)	43	3.83E-02
			cation homeostasis (GO:0055080)	42	4.79E-02
			protein phosphorylation (GO:0006468)	57	9.32E-03
			nervous system development (GO:0007399)	138	7.73E-07
			positive regulation of developmental process (GO:0051094)	79	9.60E-04
			central nervous system development (GO:0007417)	57	1.61E-02
			positive regulation of cell differentiation (GO:0045597)	56	2.05E-02
			locomotion (GO:0040011)	74	3.01E-03
			regulation of cellular component biogenesis (GO:0044087)	53	3.66E-02
			phosphorylation (GO:0016310)	73	5.12E-03
			movement of cell or subcellular component (GO:0006928)	86	1.40E-03
			chemical homeostasis (GO:0048878)	61	2.50E-02
			regulation of multicellular organismal development (GO:2000026)	112	1.76E-04
			intracellular signal transduction (GO:0035556)	91	2.34E-03
			regulation of developmental process (GO:0050793)	135	1.01E-04
			phosphate-containing compound metabolic process (GO:0006796)	112	9.00E-04
			phosphorus metabolic process (GO:0006793)	113	9.69E-04
			regulation of transport (GO:0051049)	97	4.76E-03
			positive regulation of molecular function (GO:0044093)	89	2.95E-02
			regulation of multicellular organismal process (GO:0051239)	156	1.72E-04
			regulation of localization (GO:0032879)	135	1.55E-03
			regulation of cellular component organization (GO:0051128)	119	7.38E-03
			cellular developmental process (GO:0048869)	183	1.13E-04
			anatomical structure morphogenesis (GO:0009653)	102	4.00E-02
			regulation of biological quality (GO:0065008)	192	1.24E-04
			cell differentiation (GO:0030154)	174	7.62E-04
			regulation of signaling (GO:0023051)	164	2.62E-03
			regulation of cell communication (GO:0010646)	162	3.00E-03
			system development (GO:0048731)	204	2.20E-04
			multicellular organism development (GO:0007275)	231	5.60E-05
			anatomical structure development (GO:0048856)	247	4.09E-05
			cellular component organization (GO:0016043)	255	4.57E-05
			developmental process (GO:0032502)	259	4.04E-05
			cellular component organization or biogenesis (GO:0071840)	258	1.64E-04
			signaling (GO:0023052)	227	6.74E-03
			cell communication (GO:0007154)	231	6.31E-03
			negative regulation of cellular process (GO:0048523)	199	2.90E-02
			signal transduction (GO:0007165)	210	2.83E-02
			multicellular organismal process (GO:0032501)	286	4.10E-03
			cellular response to stimulus (GO:0051716)	273	6.93E-03
			localization (GO:0051179)	234	4.82E-02
			regulation of primary metabolic process (GO:0080090)	245	4.57E-02
			response to stimulus (GO:0050896)	327	4.86E-02
			regulation of biological process (GO:0050789)	452	3.99E-04
			regulation of cellular process (GO:0050794)	424	1.70E-03
			biological regulation (GO:0065007)	474	3.93E-04
			cellular process (GO:0009987)	548	4.48E-05
			biological_process (GO:0008150)	629	9.40E-03
			Unclassified (UNCLASSIFIED)	68	9.29E-03
			detection of chemical stimulus (GO:0009593)	4	4.50E-02
			sensory perception of chemical stimulus (GO:0007606)	4	3.51E-02
			sensory perception of smell (GO:0007608)	3	4.97E-02
			detection of chemical stimulus involved in sensory perception (GO:0050907)	3	3.00E-02
			detection of chemical stimulus involved in sensory perception of smell (GO:0050911)	2	2.46E-02
			GO cellular component complete	number of genes	FDR
			catenin complex (GO:0016342)	7	5.07E-03
			intrinsic component of postsynaptic specialization membrane (GO:0098948)	17	1.83E-06
			integral component of postsynaptic specialization membrane (GO:0099060)	16	4.70E-06
			dendrite membrane (GO:0032590)	8	5.08E-03
			integral component of postsynaptic membrane (GO:0099055)	22	2.50E-07
			intrinsic component of postsynaptic membrane (GO:0098936)	23	1.68E-07
			postsynaptic specialization membrane (GO:0099634)	19	2.18E-06
			GABA-ergic synapse (GO:0098982)	13	2.85E-04
			intrinsic component of postsynaptic density membrane (GO:0099146)	9	8.77E-03
			integral component of postsynaptic density membrane (GO:0099061)	8	2.35E-02
			intrinsic component of synaptic membrane (GO:0099240)	25	6.27E-07
			integral component of synaptic membrane (GO:0099699)	23	2.20E-06
			postsynaptic density membrane (GO:0098839)	11	5.35E-03
			neuron projection membrane (GO:0032589)	8	3.74E-02
			Schaffer collateral - CA1 synapse (GO:0098685)	11	8.38E-03
			filopodium (GO:0030175)	13	4.16E-03
			postsynaptic membrane (GO:0045211)	41	2.69E-09
			intrinsic component of presynaptic membrane (GO:0098889)	10	2.60E-02
			dendritic spine (GO:0043197)	19	2.79E-04
			neuron spine (GO:0044309)	19	3.11E-04
			postsynaptic specialization (GO:0099572)	39	1.96E-07
			postsynapse (GO:0098794)	68	1.86E-13
			glutamatergic synapse (GO:0098978)	38	3.59E-07
			synaptic membrane (GO:0097060)	44	1.84E-07
			postsynaptic density (GO:0014069)	33	8.50E-06
			asymmetric synapse (GO:0032279)	33	1.05E-05
			perikaryon (GO:0043204)	13	2.99E-02
			neuron to neuron synapse (GO:0098984)	33	3.43E-05
			actin-based cell projection (GO:0098858)	19	5.56E-03
			synapse part (GO:0044456)	85	2.10E-12
			growth cone (GO:0030426)	15	3.86E-02
			dendrite (GO:0030425)	51	6.59E-07
			dendritic tree (GO:0097447)	51	6.78E-07
			synapse (GO:0045202)	101	1.76E-13
			site of polarized growth (GO:0030427)	15	4.86E-02
			somatodendritic compartment (GO:0036477)	65	2.38E-07
			presynapse (GO:0098793)	39	1.90E-04
			cell leading edge (GO:0031252)	30	4.19E-03
			neuronal cell body (GO:0043025)	36	2.36E-03
			axon (GO:0030424)	43	7.45E-04
			neuron part (GO:0097458)	120	1.42E-10
			neuron projection (GO:0043005)	90	1.67E-07
			cell-cell junction (GO:0005911)	30	3.26E-02
			cell body (GO:0044297)	37	9.03E-03
			plasma membrane region (GO:0098590)	73	9.33E-05
			cell projection part (GO:0044463)	88	2.98E-05
			plasma membrane bounded cell projection part (GO:0120038)	88	2.87E-05
			plasma membrane bounded cell projection (GO:0120025)	125	1.96E-07
			cell projection (GO:0042995)	129	1.61E-07
			cell junction (GO:0030054)	75	4.53E-04
			Golgi apparatus part (GO:0044431)	52	4.49E-02
			endomembrane system (GO:0012505)	195	2.41E-03
			cytosol (GO:0005829)	219	2.08E-03
			cell periphery (GO:0071944)	245	2.07E-03
			plasma membrane (GO:0005886)	237	5.44E-03
			cytoplasmic part (GO:0044444)	398	5.60E-06
			cytoplasm (GO:0005737)	453	5.23E-05
			organelle part (GO:0044422)	372	5.11E-03
			organelle (GO:0043226)	517	2.99E-05
			membrane (GO:0016020)	372	2.27E-02
			membrane-bounded organelle (GO:0043227)	473	6.40E-04
			intracellular organelle (GO:0043229)	482	7.30E-04
			intracellular membrane-bounded organelle (GO:0043231)	414	1.50E-02
			intracellular part (GO:0044424)	546	3.78E-05
			intracellular (GO:0005622)	546	3.68E-05
			cell part (GO:0044464)	615	1.87E-04
			cell (GO:0005623)	617	1.72E-04
			cellular_component (GO:0005575)	659	7.55E-04
			Unclassified (UNCLASSIFIED)	38	7.38E-04
			GO molecular function complete	number of genes	FDR
			diacylglycerol kinase activity (GO:0004143)	5	3.20E-02
			phosphoric diester hydrolase activity (GO:0008081)	12	3.59E-02
			calmodulin binding (GO:0005516)	18	4.93E-02
			protein serine/threonine kinase activity (GO:0004674)	34	7.31E-03
			phosphotransferase activity, alcohol group as acceptor (GO:0016773)	52	6.95E-04
			phospholipid binding (GO:0005543)	31	3.62E-02
			kinase activity (GO:0016301)	57	4.35E-04
			transferase activity, transferring phosphorus-containing groups (GO:0016772)	68	4.67E-05
			protein kinase activity (GO:0004672)	42	8.18E-03
			lipid binding (GO:0008289)	45	3.86E-02
			cytoskeletal protein binding (GO:0008092)	58	2.11E-02
			adenyl ribonucleotide binding (GO:0032559)	89	1.15E-03
			adenyl nucleotide binding (GO:0030554)	89	1.05E-03
			ATP binding (GO:0005524)	85	1.67E-03
			drug binding (GO:0008144)	95	2.29E-03
			ribonucleotide binding (GO:0032553)	95	3.88E-02
			purine ribonucleotide binding (GO:0032555)	94	3.89E-02
			transferase activity (GO:0016740)	115	1.12E-02
			anion binding (GO:0043168)	138	2.22E-03
			purine nucleotide binding (GO:0017076)	94	5.04E-02
			ion binding (GO:0043167)	288	2.18E-06
			cation binding (GO:0043169)	194	2.91E-03
			metal ion binding (GO:0046872)	189	5.42E-03
			olfactory receptor activity (GO:0004984)	2	3.69E-02

## Sheet: remyelination
			There are no detected enrichment of known patways, cellular components, functions or processes for the remyelinating specifc gene list
			I tried both with FDR<0.001 (same as how the others are made) and with FDR<0.05
